# Supplementary material for: Dinitrogen Fixation: Rationalizing Strategies Utilizing Molecular Complexes
Source: PubMed Central journal article supplement — Chemistry. 2020 Dec 29;27(12):3892–928. doi: 10.1002/chem.202003134 (PMC7986120; doi:10.1002/chem.202003134), 2020-12-29
Supplement: CHEM-27-3892-s001.pdf [file CHEM-27-3892-s001.pdf]

# Chemistry–A European Journal

Supporting Information

## **Dinitrogen Fixation: Rationalizing Strategies Utilizing Molecular Complexes**

Fabio Masero<sup>+</sup>, Marie A. Perrin<sup>+</sup>, Subal Dey, and Victor Mougel<sup>\*[a]</sup>

# Contents

|                                                                                                         |    |
|---------------------------------------------------------------------------------------------------------|----|
| 1. Summary of used complexes and reagents for $N_2$ to metal-nitride formation. ....                    | 2  |
| 2. Summary of used complexes and reagents to functionalize nitride originating from $N_2$ .....         | 4  |
| 3. Summary of used complexes and reagents for stoichiometric $N_2$ protonation and $N_2$ -hydrogenation | 5  |
| 4. Summary of used complexes and reagents for stoichiometric $N_2$ silylation.....                      | 7  |
| 5. Summary of used complexes and reagents for stoichiometric N-C bond formation.....                    | 8  |
| 6. Summary of complexes and reagents for catalytic $N_2$ protonation.....                               | 10 |
| 7. Summary of complexes and reagents for catalytic $N_2$ silylation .....                               | 12 |
| 8. References.....                                                                                      | 10 |

# 1. Summary of used complexes and reagents for N<sub>2</sub> to metal-nitride formation.

**Table S1.** Summary of used complexes and reagents for metal nitride formation.

| <b>Complex</b>                                                                                                                                                                                 | <b>Reagent</b>                                                                                                          | <b>Selectivity<sup>[a]</sup></b>                                                                                                                                                                    | <b>Ref.</b> |
|------------------------------------------------------------------------------------------------------------------------------------------------------------------------------------------------|-------------------------------------------------------------------------------------------------------------------------|-----------------------------------------------------------------------------------------------------------------------------------------------------------------------------------------------------|-------------|
| Mo(N( <sup>t</sup> BuAr) <sub>3</sub> ) <sub>2</sub> (1)                                                                                                                                       | N <sub>2</sub><br><i>hν</i>                                                                                             | [Mo(N)(N( <sup>t</sup> BuAr) <sub>3</sub> ) (2)                                                                                                                                                     | [1]<br>[2]  |
| [Mo(OSi(O <sup>t</sup> Bu) <sub>3</sub> ) <sub>3</sub> ] (3)                                                                                                                                   | N <sub>2</sub>                                                                                                          | [Mo(N)(OSi(O <sup>t</sup> Bu) <sub>3</sub> ) <sub>3</sub> ] (4)                                                                                                                                     | [3]         |
| [Ti(Cp')(CH <sub>2</sub> SiMe <sub>3</sub> ) <sub>3</sub> ] (90)<br>Cp' = C <sub>5</sub> Me <sub>4</sub> SiMe <sub>3</sub>                                                                     | N <sub>2</sub> /H <sub>2</sub>                                                                                          | {[Ti(Cp')] <sub>4</sub> (μ <sub>3</sub> -NH) <sub>2</sub> (μ <sub>2</sub> -H) <sub>4</sub> }                                                                                                        | [4]         |
| {[Ti(Cp')] <sub>3</sub> (μ <sub>3</sub> -H)(μ <sub>2</sub> -H) <sub>6</sub> } (5)<br>Cp' = C <sub>5</sub> Me <sub>4</sub> SiMe <sub>3</sub>                                                    | N <sub>2</sub>                                                                                                          | {[(Cp')Ti] <sub>3</sub> (μ <sub>2</sub> -NH)(μ <sub>3</sub> -N)(μ <sub>2</sub> -H) <sub>2</sub> } (6)                                                                                               | [4]         |
| {[Ti(Cp')] <sub>3</sub> (μ <sub>2</sub> -NH)(μ <sub>3</sub> -N)(μ <sub>2</sub> -H) <sub>2</sub> }                                                                                              | <sup>15</sup> N                                                                                                         | {[(Cp')Ti] <sub>3</sub> (μ <sub>3</sub> - <sup>15</sup> N)(μ <sub>2</sub> -NH) <sub>2</sub> (μ <sub>2</sub> - <sup>15</sup> NH)}                                                                    | [4]         |
| {[( <i>anti</i> -O <sub>3</sub> )Nb(μ-H) <sub>4</sub> ][K(dme)] <sub>2</sub> } (11)<br><i>anti</i> -O <sub>3</sub> = CH{3,5-( <sup>t</sup> Bu) <sub>2</sub> Ph-2-O} <sub>3</sub> <sup>3-</sup> | N <sub>2</sub>                                                                                                          | {[( <i>anti</i> -O <sub>3</sub> )Nb(μ-N) <sub>2</sub> ][K(thf)] <sub>2</sub> } (12)                                                                                                                 | [5]         |
| [( <i>calix</i> -O <sub>4</sub> ) <sub>2</sub> Nb <sub>2</sub> ] (13)                                                                                                                          | N <sub>2</sub><br>N <sub>2</sub> , TMEDA                                                                                | [( <i>calix</i> -O <sub>4</sub> )Nb(N) <sub>2</sub> ][Nb( <i>calix</i> -O <sub>4</sub> )] (14)<br>[( <i>calix</i> -O <sub>4</sub> ) <sub>2</sub> Nb <sub>2</sub> (μ-NNa(TMEDA)) <sub>2</sub> ] (15) | [6, 7]      |
| [Mo <sub>2</sub> (PCP)] (18)<br>PCP = 1,3-[OP( <sup>t</sup> Bu) <sub>2</sub> ] <sub>2</sub> C <sub>6</sub> H <sub>3</sub> <sup>-</sup>                                                         | Na(Hg)/N <sub>2</sub>                                                                                                   | [Mo(N)(PCP)] (19)                                                                                                                                                                                   | [8]         |
| [Mo(PNP)] <sub>3</sub> (20)<br>PNP = 1,3-[CH <sub>2</sub> P( <sup>t</sup> Bu) <sub>2</sub> ] <sub>2</sub> C <sub>5</sub> H <sub>3</sub> N                                                      | (CoCp* <sub>2</sub> )/N <sub>2</sub><br>SmI <sub>2</sub> /N <sub>2</sub>                                                | [Mo(N)(PNP)] (21)                                                                                                                                                                                   | [9, 10]     |
| [Mo(PNP)Cl <sub>3</sub> ] (24)<br>PNP = N(CH <sub>2</sub> CH <sub>2</sub> P <sup>t</sup> Bu <sub>2</sub> ) <sub>2</sub> <sup>-</sup>                                                           | i.) Na(Hg)/N <sub>2</sub><br>ii.) HOTf                                                                                  | [Mo(HPNP)(N)Cl] <sup>+</sup> (23)                                                                                                                                                                   | [11]        |
| [W(PNP)Cl <sub>3</sub> ]<br>PNP = N(CH <sub>2</sub> CH <sub>2</sub> P <sup>t</sup> Bu <sub>2</sub> ) <sub>2</sub> <sup>-</sup>                                                                 | Na(Hg)/N <sub>2</sub>                                                                                                   | [W(HPNP)(N)Cl] <sup>+</sup>                                                                                                                                                                         | [12]        |
| [Mo(PPP)Cl <sub>3</sub> ] (29)<br>PPP = PhP(CH <sub>2</sub> CH <sub>2</sub> PCy <sub>2</sub> ) <sub>2</sub>                                                                                    | Na(Hg), NaI/N <sub>2</sub>                                                                                              | [Mo(N)(PPP)] (31)                                                                                                                                                                                   | [13]        |
| [ReCl <sub>2</sub> (PNP)] (32)<br>PNP = N(CH <sub>2</sub> CH <sub>2</sub> P <sup>t</sup> Bu <sub>2</sub> ) <sub>2</sub> <sup>-</sup>                                                           | CoCp* <sub>2</sub> /N <sub>2</sub><br>Na(Hg)/N <sub>2</sub><br><i>E</i> <sub>red</sub> = -1.9 V vs. Fc/Fc <sup>+</sup>  | [Re <sup>v</sup> Cl(N)(PNP)] (33)                                                                                                                                                                   | [14]        |
| [ReCl <sub>2</sub> (PNP)] (35)<br>PNP = N(CH <sub>2</sub> CH <sub>2</sub> P <sup>t</sup> Bu <sub>2</sub> ) <sub>2</sub>                                                                        | CoCp* <sub>2</sub> /N <sub>2</sub><br>Na(Hg)/N <sub>2</sub><br><i>E</i> <sub>red</sub> = -1.67 V vs. Fc/Fc <sup>+</sup> | [Re <sup>v</sup> Cl(N)(PNP)] (36)                                                                                                                                                                   | [15]        |
| [(NNN <sup>Si</sup> V) <sub>2</sub> (μ-Cl) <sub>2</sub> ] (37)<br>NNN <sup>Si</sup> = Me <sub>3</sub> SiN(CH <sub>2</sub> CH <sub>2</sub> NSiMe <sub>3</sub> ) <sub>2</sub> <sup>2-</sup>      | KC <sub>8</sub> /N <sub>2</sub>                                                                                         | [(NNN <sup>Si</sup> V) <sub>2</sub> (μ-N) <sub>2</sub> ] (38)<br>[(NNN <sup>Si</sup> V) <sub>2</sub> (μ-N) <sub>2</sub> K] <sup>-</sup> (39)                                                        | [16]        |
| [U(N <sup>4</sup> )(DME)] <sup>+</sup> (40)                                                                                                                                                    | K-C <sub>10</sub> H <sub>8</sub> /N <sub>2</sub>                                                                        | [(UN <sup>4</sup> ) <sub>2</sub> (μ-NK) <sub>2</sub> ] <sup>2-</sup> (41)                                                                                                                           | [17]        |

| N <sup>4</sup> = Et <sub>3</sub> -calix[4]tetrapyrrole                                                                                                                                                           |                                                                     |                                                                                                                                                                 |      |
|------------------------------------------------------------------------------------------------------------------------------------------------------------------------------------------------------------------|---------------------------------------------------------------------|-----------------------------------------------------------------------------------------------------------------------------------------------------------------|------|
| [(O-μ-OO) <sub>2</sub> Nb <sub>2</sub> ] ( <b>42</b> )<br>OOO = {(3-Me,5- <sup>t</sup> Bu)Ph-(2-O)CH <sub>2</sub> Ph(2-O)(4- <sup>t</sup> Bu)CH <sub>2</sub> Ph-(2-O)(3-Me,5- <sup>t</sup> Bu)} <sup>3-</sup>    | LiBEt <sub>3</sub> H/N <sub>2</sub>                                 | {[(OO-μ-O)Nb] <sub>2</sub> (μ-N) <sub>2</sub> (Li-thf) <sub>2</sub> } ( <b>43</b> )                                                                             | [18] |
| [(O-μ-NO) <sub>2</sub> V <sub>2</sub> ] ( <b>46</b> )<br>ONO = {(3-Me,5- <sup>t</sup> Bu)Ph-(2-O)CH <sub>2</sub> Ph(2-NPhMe)(4- <sup>t</sup> Bu)CH <sub>2</sub> Ph-(2-O)(3-Me,5- <sup>t</sup> Bu)} <sup>3-</sup> | KH/N <sub>2</sub>                                                   | {[(ONO)V] <sub>2</sub> (μ-N) <sub>2</sub> (K-dme) <sub>2</sub> } <sup>2-</sup> ( <b>47</b> )                                                                    | [19] |
| [Ti(N <sub>4</sub> <sup>Si</sup> )Cl] ( <b>48</b> )<br>N <sub>4</sub> <sup>Si</sup> = {N(CH <sub>2</sub> CH <sub>2</sub> NSiMe <sub>3</sub> ) <sub>3</sub> } <sup>3-</sup>                                       | Mg/N <sub>2</sub>                                                   | {[Mg(N <sub>4</sub> <sup>Si</sup> )](μ-NTi) <sub>2</sub> (Mg(N <sub>4</sub> <sup>Si</sup> ))} ( <b>50</b> )                                                     | [20] |
| [[Fe(β-diketamin)] <sub>2</sub> (μ-Cl) <sub>2</sub> ] ( <b>52</b> )<br>β-diketamin = (2,6-Me <sub>2</sub> Ph)NC(Me)CHC(Me)N(2,6-Me <sub>2</sub> Ph)                                                              | KC <sub>8</sub> /N <sub>2</sub>                                     | {[Fe(β-diketamin)] <sub>2</sub> (μ-N){(μ-N)K <sub>2</sub> Cl <sub>2</sub> Fe(β-diketamin)}]} ( <b>51</b> )                                                      | [21] |
|                                                                                                                                                                                                                  | Na/N <sub>2</sub>                                                   | {[Fe(β-diketamin)] <sub>2</sub> (μ <sub>2</sub> -N){K(thf) <sub>2</sub> (μ <sub>3</sub> -N)Fe(β-diketamin)}]} ( <b>53</b> )                                     | [22] |
| [Fe <sub>3</sub> (cyclophane-β-diketamin)Br <sub>2</sub> ] ( <b>54</b> )<br>cyclophane-β-diketamin = (2,4,6-Et-Ph-1,3,5-CH <sub>2</sub> -NC(Me)CHC(Me)N) <sub>3</sub>                                            | KC <sub>8</sub> /N <sub>2</sub>                                     | [Fe <sub>3</sub> (μ-NH) <sub>1,2</sub> (cyclophane-diketamin)] ( <b>55</b> )                                                                                    | [23] |
| [Cp*Ta{N(Pr)C(R)N(Pr)Cl <sub>3</sub> }] ( <b>57</b> )<br>Cp* = η <sup>5</sup> -C <sub>5</sub> Me <sub>5</sub> , R = Me, NMe <sub>2</sub> , Ph                                                                    | KC <sub>8</sub> /N <sub>2</sub>                                     | {[Cp*Ta{N(Pr)C(R)N(Pr)}(μ-N)] <sub>2</sub> } ( <b>56</b> )                                                                                                      | [24] |
| [Cp*Nb{N(Pr)C(R)N(Pr)Cl <sub>3</sub> }] ( <b>58</b> )<br>R = Me, Ph                                                                                                                                              | KC <sub>8</sub> /N <sub>2</sub>                                     | {[Cp*Nb{N(Pr)C(R)N(Pr)}(μ-N)] <sub>2</sub> } ( <b>59</b> )                                                                                                      | [25] |
| {[Cp*MNEtC(R)NEt] <sub>2</sub> (μ-N <sub>2</sub> )]<br>M = Mo ( <b>60</b> ), W ( <b>61</b> ); R = Ph                                                                                                             | Na(Hg)/N <sub>2</sub>                                               | {[Cp*MNEtC(R)NEt] <sub>2</sub> (μ-N) <sub>2</sub> }                                                                                                             | [26] |
| [MoCl <sub>4</sub> -DME]                                                                                                                                                                                         | i.) MesMgBr/N <sub>2</sub><br>ii.) <i>hν</i>                        | [Mo(Mes) <sub>3</sub> -N=Mo(Mes) <sub>3</sub> ] ( <b>63</b> )<br>Mes = 2,4,6-Me <sub>3</sub> (C <sub>6</sub> H <sub>2</sub> )                                   | [27] |
| {Re(P'NP')Cl <sub>3</sub> }<br>P'NP' = (2,6-OP'Pr <sub>2</sub> )C <sub>5</sub> H <sub>3</sub> N                                                                                                                  | i.) LiBHEt <sub>3</sub> /N <sub>2</sub><br>ii.) <i>hν</i> (λ = 405) | {[Re(N)(P'NP')Cl]} ( <b>66</b> )                                                                                                                                | [28] |
| {[MoCp*(depf)] <sub>2</sub> (N <sub>2</sub> )} ( <b>67</b> )                                                                                                                                                     | <i>hν</i> (λ > 400)                                                 | {[MoCp*(depf)(N)]} ( <b>68</b> )                                                                                                                                | [29] |
| {[Cp*M{N(Pr)C(R)N(Pr)}] <sub>2</sub> (μ-N <sub>2</sub> )]<br>M = Mo ( <b>69</b> ), W ( <b>70</b> ); R = Me                                                                                                       | <i>hν</i>                                                           | {[Cp*M{N(Pr)C(R)N(Pr)}] <sub>2</sub> (μ-N) <sub>2</sub> } (M = Mo, <b>71</b> ;<br>M = W, <b>72</b> )<br>[[Cp*M(N){N(Pr)C(R)N(Pr)}] <sub>2</sub> ] ( <b>73</b> ) | [30] |
| <i>trans</i> -[Mo(depe) <sub>2</sub> (N <sub>2</sub> ) <sub>2</sub> ] ( <b>74</b> )<br>depe = Et <sub>2</sub> PCH <sub>2</sub> CH <sub>2</sub> PET <sub>2</sub>                                                  | Oxidation, E <sub>red</sub> = 0.5 V vs. Pt-wire                     | [Mo(depe) <sub>2</sub> (N)] ( <b>75</b> )                                                                                                                       | [31] |

## 2. Summary of used complexes and reagents to functionalize nitride originating from N<sub>2</sub>

**Table S2.** Summary of used complexes and reagents for nitride functionalization.

| Nitride Complex                                                                                                                             | Reagent                                                                                                                                         | Selectivity <sup>bl</sup>                                               | Ref.    |
|---------------------------------------------------------------------------------------------------------------------------------------------|-------------------------------------------------------------------------------------------------------------------------------------------------|-------------------------------------------------------------------------|---------|
| [Mo <sup>VI</sup> (N <sup>t</sup> BuAr) <sub>3</sub> (N)] (2)                                                                               | Mel                                                                                                                                             | [Mo <sup>VI</sup> (N <sup>t</sup> BuAr) <sub>3</sub> (NR)] <sup>+</sup> | [32]    |
| [Nb <sup>V</sup> (N <sup>t</sup> BuAr') <sub>3</sub> N][Na] (77)                                                                            | RCOCl                                                                                                                                           | RCN                                                                     | [33]    |
| [Mo <sup>VI</sup> (N <sup>t</sup> BuAr) <sub>3</sub> ( <sup>15</sup> N)] (2- <sup>15</sup> N)                                               | (CF <sub>3</sub> CO) <sub>2</sub> O                                                                                                             | CF <sub>3</sub> CO <sup>15</sup> NH <sub>2</sub>                        | [34]    |
| [Mo <sup>VI</sup> (N <sup>t</sup> BuAr) <sub>3</sub> (N)] (2)                                                                               | RC(O)Cl + R' <sub>3</sub> SiOTf + Mg(anthracene) + MCl <sub>2</sub> (M = Sn, Zn)                                                                | RCN (R = Me, <sup>t</sup> Bu, Ph)                                       | [35]    |
| [(ONO) <sup>V</sup> (μ-N)] <sub>2</sub> [K(dme)] <sub>2</sub> (47)                                                                          | CO or isocyanide                                                                                                                                | potassium isocyanate <b>81</b> or carbodiimide complex <b>82</b> .      | [19]    |
| [[(anti-O <sub>3</sub> )Nb <sup>V</sup> ] <sub>2</sub> (μ-N)] <sub>2</sub> [K(thf)] <sub>2</sub> (12)                                       | Mel, CO <sub>2</sub>                                                                                                                            | Imide, ureate complex <b>79</b> .                                       | [5, 36] |
| [(Cp*Mo[N(Pr)C(Me)N(Pr)]) <sub>2</sub> (μ-N <sub>2</sub> )] (69)                                                                            | R <sub>3</sub> ECl (R <sub>3</sub> E = Me <sub>3</sub> Si, Ph <sub>3</sub> Si, Me <sub>3</sub> Ge or Me <sub>3</sub> C) + CO or CO <sub>2</sub> | RNCO                                                                    | [37]    |
| [Re <sup>V</sup> (PNP)Cl(N)] (33)<br>(PNP = (( <sup>t</sup> Bu) <sub>2</sub> P(CH <sub>2</sub> CH <sub>2</sub> )N)                          | MeOTf                                                                                                                                           | Imide complex <b>83</b> .                                               | [38]    |
| [Re <sup>V</sup> (PNP)Cl(N)] (33)<br>(PNP = (( <sup>t</sup> Bu) <sub>2</sub> P(CH <sub>2</sub> CH <sub>2</sub> )N)                          | EtOTf, (KN(SiMe <sub>3</sub> ) <sub>2</sub> ), NCS                                                                                              | MeCN                                                                    | [39]    |
| [Re <sup>V</sup> (PNP)Cl(N)] (33)<br>(PNP = (( <sup>t</sup> Bu) <sub>2</sub> P(CH <sub>2</sub> CH <sub>2</sub> )N)                          | i.) BnBr, AgOTf, DTBMP,<br>ii.) (KN(SiMe <sub>3</sub> ) <sub>2</sub> )<br>iii.) NCS                                                             | PhCN                                                                    | [40]    |
| [Re <sup>V</sup> (PNP)Cl(N)] (33)<br>(PNP = ((Pr) <sub>2</sub> P(CH <sub>2</sub> CH <sub>2</sub> )N)                                        | i.) hν (390 nm)<br>ii.) PhC(O)Cl<br>iii.) E = -1.67 V, N <sub>2</sub>                                                                           | PhCN + PhC(O)NH <sub>2</sub>                                            | [41]    |
| [(Cp'Ti) <sub>4</sub> (μ <sup>3</sup> -NH) <sub>2</sub> (μ <sup>3</sup> -N)] (89) (Cp' = C <sub>5</sub> Me <sub>4</sub> SiMe <sub>3</sub> ) | RC(O)Cl (R = aryl, Bn, Me, <sup>t</sup> Bu)                                                                                                     | RCN                                                                     | [42]    |
| [Mo <sup>IV</sup> (PPP <sup>Cy</sup> )(N)(I)] (31)                                                                                          | 1,2-bisdimethylsilyethane                                                                                                                       | Bis(silyl)amine                                                         | [13]    |
| [(Ta <sup>V</sup> (NN)Cp*)(μ-N)] <sub>2</sub> (56)                                                                                          | PhSiH <sub>3</sub>                                                                                                                              | Silylimido complex <b>92</b> .                                          | [24]    |
| [(Mo <sup>II</sup> (NN)Cp*)(μ-N)] <sub>2</sub> (60) <sup>a</sup>                                                                            | Me <sub>3</sub> SiCl + <sup>t</sup> PrOH                                                                                                        | HN(SiMe <sub>3</sub> ) <sub>2</sub>                                     | [43]    |

[a] *in-situ* generation of the metal nitride

### 3. Summary of used complexes and reagents for stoichiometric N<sub>2</sub> protonation and N<sub>2</sub>-hydrogenation

**Table S3.** Summary of used complexes and reagents for stoichiometric N-H bond formation.

| Complex                                                                                                                                                                                                                                 | Reagent                         | Selectivity <sup>[b]</sup>                                                                                                                                                                        | Ref. |
|-----------------------------------------------------------------------------------------------------------------------------------------------------------------------------------------------------------------------------------------|---------------------------------|---------------------------------------------------------------------------------------------------------------------------------------------------------------------------------------------------|------|
| <i>trans</i> -[W(N <sub>2</sub> ) <sub>2</sub> (dppe) <sub>2</sub> ] ( <b>94</b> )<br>dppe = Ph <sub>2</sub> PCH <sub>2</sub> CH <sub>2</sub> PPh <sub>2</sub>                                                                          | HX (X = Cl, Br)                 | <i>trans</i> -[W(NH-NH)(dppe) <sub>2</sub> X] <sup>+</sup> ( <b>97</b> )                                                                                                                          | [44] |
| <i>trans</i> -[Mo(N <sub>2</sub> ) <sub>2</sub> (depe) <sub>2</sub> ] ( <b>95</b> )<br>depe = Et <sub>2</sub> PCH <sub>2</sub> CH <sub>2</sub> PEt <sub>2</sub>                                                                         | HX (X = Cl, Br)                 | <i>trans</i> -[Mo(NH-NH)(dppe) <sub>2</sub> X] <sup>+</sup> ( <b>98</b> )                                                                                                                         | [45] |
| <i>trans</i> -[W(N <sub>2</sub> ) <sub>2</sub> (depf) <sub>2</sub> ] ( <b>103</b> )<br>depf = Et <sub>2</sub> PFcPEt <sub>2</sub>                                                                                                       | HOTf                            | <i>trans</i> -[W(N-NH <sub>2</sub> )(depf) <sub>2</sub> OTf] <sup>+</sup> ( <b>101</b> )                                                                                                          | [46] |
| <i>trans</i> -[W(N <sub>2</sub> ) <sub>2</sub> (depr) <sub>2</sub> ] ( <b>104</b> )<br>depr = Et <sub>2</sub> PRuCP <sub>2</sub> PEt <sub>2</sub>                                                                                       | HOTf                            | <i>trans</i> -[W(N-NH <sub>2</sub> )(depr) <sub>2</sub> OTf] <sup>+</sup>                                                                                                                         | [47] |
| <i>trans</i> -[W(N <sub>2</sub> ) <sub>2</sub> (depc) <sub>2</sub> ] ( <b>105</b> )                                                                                                                                                     | HOTf                            | <i>trans</i> -[W(N-NH <sub>2</sub> )(depc) <sub>2</sub> OTf] <sup>++</sup>                                                                                                                        | [48] |
| <i>trans</i> -[Mo(N <sub>2</sub> ) <sub>2</sub> (depf) <sub>2</sub> ] ( <b>106</b> )                                                                                                                                                    | HOTf                            | <i>trans</i> -[Mo(N-NH <sub>2</sub> )(depf) <sub>2</sub> OTf] <sup>+</sup> ( <b>102</b> )                                                                                                         | [46] |
| <i>trans</i> -[Mo(N <sub>2</sub> ) <sub>2</sub> (depc) <sub>2</sub> ] ( <b>107</b> )                                                                                                                                                    | HOTf                            | <i>trans</i> -[Mo(N-NH <sub>2</sub> )(depc) <sub>2</sub> OTf] <sup>+</sup>                                                                                                                        | [48] |
| <i>trans</i> -[W(N <sub>2</sub> ) <sub>2</sub> (depf)(PPh <sub>2</sub> Me) <sub>2</sub> ] ( <b>108</b> )                                                                                                                                | H <sub>2</sub> SO <sub>4</sub>  | NH <sub>4</sub> <sup>+</sup>                                                                                                                                                                      | [46] |
| <i>trans</i> -[Mo(N <sub>2</sub> ) <sub>2</sub> (depf)(PPh <sub>2</sub> Me) <sub>2</sub> ] ( <b>110</b> )                                                                                                                               | H <sub>2</sub> SO <sub>4</sub>  | NH <sub>4</sub> <sup>+</sup>                                                                                                                                                                      | [46] |
| <i>trans</i> -[W(N <sub>2</sub> ) <sub>2</sub> (depc)(PPh <sub>2</sub> Me) <sub>2</sub> ] ( <b>109</b> )                                                                                                                                | H <sub>2</sub> SO <sub>4</sub>  | NH <sub>4</sub> <sup>+</sup>                                                                                                                                                                      | [48] |
| <i>trans</i> -[W(N <sub>2</sub> ) <sub>2</sub> (PPh <sub>2</sub> Me) <sub>4</sub> ] ( <b>121</b> )                                                                                                                                      | HCl                             | <i>trans</i> -[W(NH=NH)(Me <sub>2</sub> PPh) <sub>4</sub> Cl] <sup>+</sup> ( <b>122</b> )                                                                                                         | [45] |
| <i>trans</i> -[W(N <sub>2</sub> ) <sub>2</sub> (MePPh <sub>2</sub> ) <sub>4</sub> ] ( <b>121</b> )                                                                                                                                      | H <sub>2</sub> SO <sub>4</sub>  | NH <sub>3</sub>                                                                                                                                                                                   | [49] |
| <i>cis</i> -[W(N <sub>2</sub> ) <sub>2</sub> (Me <sub>2</sub> PPh) <sub>4</sub> ] ( <b>123</b> )                                                                                                                                        | H <sub>2</sub> SO <sub>4</sub>  | NH <sub>3</sub>                                                                                                                                                                                   | [49] |
| <i>cis</i> -[Mo(N <sub>2</sub> ) <sub>2</sub> (Me <sub>2</sub> PPh) <sub>4</sub> ] ( <b>124</b> )                                                                                                                                       | H <sub>2</sub> SO <sub>4</sub>  | NH <sub>3</sub> , NH <sub>2</sub> -NH <sub>2</sub>                                                                                                                                                | [50] |
| <i>cis</i> -[Mo(N <sub>2</sub> ) <sub>2</sub> (PPP)PPh <sub>3</sub> ] ( <b>125</b> )<br>PPP = <i>bis</i> -(2-diphenylphosphinoethylene)phenylphosphine                                                                                  | HBr                             | NH <sub>3</sub>                                                                                                                                                                                   | [51] |
| <i>cis</i> -[Mo(N <sub>2</sub> ) <sub>2</sub> (PPP)(depf)] ( <b>127</b> )                                                                                                                                                               | HBr                             | NH <sub>3</sub>                                                                                                                                                                                   | [52] |
| <i>trans</i> -[Cr(N <sub>2</sub> ) <sub>2</sub> (dmpe) <sub>2</sub> ]<br>dmpe = Me <sub>2</sub> PCH <sub>2</sub> CH <sub>2</sub> PMe <sub>2</sub>                                                                                       | HOTf                            | [Cr(N-NH <sub>2</sub> )(dmpe) <sub>2</sub> (OTf)] <sup>+</sup>                                                                                                                                    | [53] |
| [Cr(N <sub>2</sub> ) <sub>2</sub> (P <sup>Ph</sup> <sub>4</sub> N <sup>Bn</sup> <sub>4</sub> )] ( <b>130</b> )<br>P <sup>Ph</sup> <sub>4</sub> N <sup>Bn</sup> <sub>4</sub> = 1,5,9,13-benzylaza-3,7,11,15-phenylphosphocyclohexadecane | HOTf<br>HOTf, CoCp <sub>2</sub> | [Cr(N <sub>2</sub> H)(P <sup>Ph</sup> <sub>4</sub> N <sup>Bn</sup> <sub>4</sub> )] <sup>+</sup> ( <b>131</b> ) (DFT)<br>N <sub>2</sub> H <sub>5</sub> <sup>+</sup> , NH <sub>4</sub> <sup>+</sup> | [54] |
| [Cr(N <sub>2</sub> ) <sub>2</sub> (P <sup>Ph</sup> <sub>4</sub> N <sup>Bn</sup> <sub>4</sub> )] ( <b>130</b> )                                                                                                                          | TEMPOH                          | NH <sub>3</sub>                                                                                                                                                                                   | [55] |
| [Fe(N <sub>2</sub> )(DMeOPrPE) <sub>2</sub> ] ( <b>113</b> )                                                                                                                                                                            | HOTf                            | [Fe(N-NH <sub>2</sub> )(DMeOPrPE) <sub>2</sub> ] <sup>+</sup>                                                                                                                                     | [56] |

|                                                                                                                                                                                                                         |                                                                                                                                                                                                                                  |                                                                                                                             |          |
|-------------------------------------------------------------------------------------------------------------------------------------------------------------------------------------------------------------------------|----------------------------------------------------------------------------------------------------------------------------------------------------------------------------------------------------------------------------------|-----------------------------------------------------------------------------------------------------------------------------|----------|
| [Fe(N <sub>2</sub> )(dppe) <sub>2</sub> ] ( <b>112</b> )                                                                                                                                                                | HCl                                                                                                                                                                                                                              | NH <sub>3</sub> , NH <sub>2</sub> -NH <sub>2</sub>                                                                          | [57]     |
| [Fe(dmpe) <sub>2</sub> (N <sub>2</sub> )] ( <b>111</b> )                                                                                                                                                                | H(OEt <sub>2</sub> ) <sub>2</sub> OTf/THF<br>H(OEt <sub>2</sub> ) <sub>2</sub> OTf/Pentane                                                                                                                                       | NH <sub>3</sub><br>NH <sub>2</sub> -NH <sub>2</sub>                                                                         | [58]     |
| [(Cp <sup>+</sup> ) <sub>2</sub> Zr(N <sub>2</sub> )-(μ <sup>2</sup> -N <sub>2</sub> )-Zr(N <sub>2</sub> )(Cp <sup>+</sup> ) <sub>2</sub> ] ( <b>133</b> )                                                              | HCl/Toluene                                                                                                                                                                                                                      | NH <sub>2</sub> -NH <sub>2</sub>                                                                                            | [59]     |
| [(NEt <sub>2</sub> CS <sub>2</sub> ) <sub>3</sub> Nb] <sub>2</sub> (μ-N <sub>2</sub> ) ( <b>134</b> )                                                                                                                   | HCl                                                                                                                                                                                                                              | NH <sub>2</sub> -NH <sub>2</sub> , NH <sub>3</sub>                                                                          | [60, 61] |
| [(NEt <sub>2</sub> CS <sub>2</sub> ) <sub>3</sub> Ta] <sub>2</sub> (μ-N <sub>2</sub> ) ( <b>135</b> )                                                                                                                   | HCl                                                                                                                                                                                                                              | NH <sub>2</sub> -NH <sub>2</sub> , NH <sub>3</sub>                                                                          |          |
| {[(Me <sub>3</sub> Si) <sub>2</sub> N] <sub>2</sub> (thf)Y} <sub>2</sub> (μ-η <sup>2</sup> :η <sup>2</sup> -N <sub>2</sub> [K(thf) <sub>6</sub> ]) ( <b>138</b> )                                                       | [Et <sub>3</sub> NH][BPh <sub>4</sub> ]                                                                                                                                                                                          | {[(Me <sub>3</sub> Si) <sub>2</sub> N] <sub>2</sub> (thf)Y} <sub>2</sub> (μ-N <sub>2</sub> H <sub>2</sub> ) ( <b>139</b> )  | [62]     |
| {[bis-(2 <sup>-</sup> Bu-4-Me-phenolate)methylene]Th(dme)Cl} ( <b>140</b> )                                                                                                                                             | N <sub>2</sub> /K-naphthalinide                                                                                                                                                                                                  | {[bis-(2 <sup>-</sup> Bu-4-Me-phenolate)methylene]Th(dme)NH <sub>2</sub> } ( <b>141</b> )                                   | [63]     |
| M <sub>2</sub> (mTP) <sub>2</sub> (M = U, <b>142</b> and M = Th, <b>143</b> )<br>mTP = [{2-(OC <sub>6</sub> H <sub>2</sub> -Bu-2,4) <sub>2</sub> CH}-C <sub>6</sub> H <sub>4</sub> -1,3] <sup>+</sup>                   | KC <sub>8</sub> /N <sub>2</sub>                                                                                                                                                                                                  | K <sub>4</sub> [M <sub>2</sub> (μ-N <sub>2</sub> H <sub>2</sub> )(mTP) <sub>2</sub> ] (M = U, <b>144</b> ; Th, <b>145</b> ) | [64]     |
| [K <sub>3</sub> {[U(OR) <sub>3</sub> ] <sub>2</sub> (μ-N) (μ-η <sup>2</sup> :η <sup>2</sup> -N <sub>2</sub> )}] (R = Si(O <sup>t</sup> Bu)) ( <b>147</b> )                                                              | HCl, H <sub>2</sub>                                                                                                                                                                                                              | NH <sub>3</sub>                                                                                                             | [65]     |
| <i>cis</i> -[W(N <sub>2</sub> ) <sub>2</sub> (PPh <sub>2</sub> Me) <sub>4</sub> ] ( <b>123</b> )                                                                                                                        | ZrHCPCl ( <b>148</b> )<br>CoH(CO) <sub>4</sub> ( <b>151</b> )<br>HFeCo(CO) <sub>12</sub> ( <b>149</b> )<br>(H) <sub>2</sub> Fe(CO) <sub>4</sub> ( <b>150</b> )                                                                   | NH <sub>3</sub> , NH <sub>2</sub> -NH <sub>2</sub>                                                                          | [66]     |
| <i>trans</i> -[W(N <sub>2</sub> ) <sub>2</sub> (dppe) <sub>2</sub> ] ( <b>93</b> )                                                                                                                                      | Ru(H) <sub>2</sub> Cp(dtfpe)Cl ( <b>152</b> )                                                                                                                                                                                    | NH <sub>3</sub>                                                                                                             | [67]     |
| <i>trans</i> -[W(N <sub>2</sub> ) <sub>2</sub> (dppe) <sub>2</sub> ] ( <b>93</b> )                                                                                                                                      | [Ru(H <sub>2</sub> )(dppe) <sub>2</sub> Cl] <sup>+</sup> ( <b>153</b> )                                                                                                                                                          | NH <sub>3</sub>                                                                                                             | [68]     |
| <i>cis</i> -[W(N <sub>2</sub> ) <sub>2</sub> (PPh <sub>2</sub> Me) <sub>4</sub> ] ( <b>123</b> )                                                                                                                        | {[(Cp <sup>+</sup> M) <sub>2</sub> (μ-SH) <sub>3</sub> ] {M = Ir, Rh} ( <b>154</b> , <b>155</b> )<br>[(PPP-Fe) <sub>2</sub> (μ-SH) <sub>3</sub> ] ( <b>156</b> )<br>{PPP = MeC(CH <sub>2</sub> PPh <sub>2</sub> ) <sub>3</sub> } | NH <sub>3</sub>                                                                                                             | [69]     |
| [Cr(diaminopyridine)Cl] ( <b>157</b> )                                                                                                                                                                                  | NaH                                                                                                                                                                                                                              | [Cr(N-H)(diaminopyridine)Na(thf)] ( <b>158</b> )                                                                            | [70]     |
| [(P <sub>2</sub> N <sub>2</sub> )Zr-(μ-N <sub>2</sub> )-Zr(P <sub>2</sub> N <sub>2</sub> )] ( <b>159</b> )<br>[P <sub>2</sub> N <sub>2</sub> = {(Ph-PCH <sub>2</sub> SiMe <sub>2</sub> ) <sub>2</sub> N] <sub>2</sub> } | H <sub>2</sub>                                                                                                                                                                                                                   | [(P <sub>2</sub> N <sub>2</sub> )Zr-(μ-N-NH)-Zr(P <sub>2</sub> N <sub>2</sub> )] ( <b>160</b> )                             | [71]     |
| [(CpMe <sub>4</sub> H) <sub>2</sub> Zr-(μ-N <sub>2</sub> )-Zr(CpMe <sub>4</sub> H) <sub>2</sub> ] ( <b>161</b> )                                                                                                        | H <sub>2</sub>                                                                                                                                                                                                                   | NH <sub>3</sub>                                                                                                             | [72]     |
| [(PNP)Ti-(μ-H) <sub>4</sub> -Ti(PNP)] ( <b>163</b> )                                                                                                                                                                    | -                                                                                                                                                                                                                                | [(PNP)HTi-(μ-N)(μ-NH)-Ti(PNP)] ( <b>165</b> )                                                                               | [73]     |
| [Ta(H) <sub>4</sub> (SiO) <sub>n</sub> ] ( <b>167</b> )                                                                                                                                                                 | -                                                                                                                                                                                                                                | [(≡OSi) <sub>2</sub> Ta(=NH)(NH <sub>2</sub> )] ( <b>169</b> )                                                              | [74]     |

## 4. Summary of used complexes and reagents for stoichiometric N<sub>2</sub> silylation.

**Table S4.** Summary of used complexes and reagents for stoichiometric silylation of metal-dinitrogen complexes.

| <b>Complex</b>                                                                                                                                                                             | <b>Reagent</b>                                                                                     | <b>Selectivity</b>                                                                                                                                                         | <b>Ref.</b> |
|--------------------------------------------------------------------------------------------------------------------------------------------------------------------------------------------|----------------------------------------------------------------------------------------------------|----------------------------------------------------------------------------------------------------------------------------------------------------------------------------|-------------|
| [Mo(N <sub>2</sub> ) Cp*(depf)] ( <b>170</b> )                                                                                                                                             | Me <sub>3</sub> SiCl                                                                               | [Mo(N=N-SiMe <sub>3</sub> ) Cp*(depf)] ( <b>171</b> )                                                                                                                      | [75]        |
| Mg(thf) <sub>4</sub> [Co(PhBP <sup>iPr</sup> <sub>3</sub> )(N <sub>2</sub> ) <sub>2</sub> ] ( <b>172</b> )<br>[P <sub>3</sub> <sup>B</sup> = Tris-[2-(diisopropylphosphino)-phenyl]borane] | Me <sub>3</sub> SiCl                                                                               | [(PhBP <sup>iPr</sup> <sub>3</sub> )CoN=N-TMS] ( <b>174</b> )                                                                                                              | [76]        |
| [Co(EP <sup>Ph</sup> <sub>3</sub> )Cl] (E=N, <b>175</b> ; E=CMe, <b>176</b> )<br>EP <sup>Ph</sup> <sub>3</sub> = E(CH <sub>2</sub> CH <sub>2</sub> PPh <sub>2</sub> ) <sub>3</sub>         |                                                                                                    | [Co(XP <sup>Ph</sup> <sub>3</sub> )(N=NTMS)]<br>(E=N, <b>177</b> ; E=CMe, <b>178</b> )                                                                                     | [77]        |
| [Fe(P <sub>3</sub> <sup>B</sup> )Cl] ( <b>179</b> )<br>(P <sub>3</sub> <sup>B</sup> = [tris-(2-diisopropylphosphino)-borane])                                                              | N <sub>2</sub> /Na(Hg)<br>ClMe <sub>2</sub> SiCH <sub>2</sub> CH <sub>2</sub> SiMe <sub>2</sub> Cl | [(P <sub>3</sub> <sup>B</sup> )Fe=N-N(Me <sub>2</sub> SiCH <sub>2</sub> CH <sub>2</sub> SiMe <sub>2</sub> )]<br>( <b>181</b> )                                             | [78]        |
| [Fe <sub>2</sub> (P <sub>2</sub> <sup>B</sup> ) <sub>2</sub> (N <sub>2</sub> )] ( <b>183</b> )<br>(P <sub>2</sub> <sup>B</sup> = [bis-(2-diisopropylphosphino)-phenylborane])              | Na/ClMe <sub>2</sub> SiCH <sub>2</sub> CH <sub>2</sub> SiMe <sub>2</sub> Cl                        | [(P <sub>2</sub> <sup>B</sup> )Fe=N-N(Me <sub>2</sub> SiCH <sub>2</sub> CH <sub>2</sub> SiMe <sub>2</sub> )]<br>( <b>184</b> )                                             | [79]        |
| [Fe(N <sub>2</sub> )AltraPhos] <sup>-</sup> ( <b>188</b> )<br>AltraPhos = Al[N(o-C <sub>6</sub> H <sub>4</sub> NCH <sub>2</sub> PIPr <sub>2</sub> ) <sub>3</sub> ]                         | KC <sub>8</sub> /ClMe <sub>2</sub> SiCH <sub>2</sub> CH <sub>2</sub> SiMe <sub>2</sub> Cl          | [Fe{N <sub>2</sub> (SiMe <sub>2</sub> CH <sub>2</sub> ) <sub>2</sub> }AltraPhos] ( <b>189</b> )                                                                            | [80]        |
| [(μ-η <sup>1</sup> :η <sup>2</sup> -N <sub>2</sub> ){Ta(NPN)H} <sub>2</sub> ] ( <b>190</b> )<br>[NPN = (PhNSiMe <sub>2</sub> CH <sub>2</sub> ) <sub>2</sub> PPh]                           | RSiH <sub>3</sub> {R = <sup>n</sup> Bu, Ph}                                                        | [[Ta(NPN)] <sub>2</sub> (μ-NSiH <sub>2</sub> R) <sub>2</sub> ] ( <b>194</b> , <b>195</b> )<br>(R = Ph, <sup>n</sup> Bu)                                                    | [81]        |
| [[{η <sup>5</sup> -C <sub>5</sub> H <sub>2</sub> -1,2,4-Me <sub>3</sub> ] <sub>2</sub> Hf] <sub>2</sub> (μ <sub>2</sub> ,η <sup>2</sup> ,η <sup>2</sup> -N <sub>2</sub> )] ( <b>196</b> )  | CySiH <sub>3</sub>                                                                                 | [[{η <sup>5</sup> -C <sub>5</sub> H <sub>2</sub> -1,2,4-Me <sub>3</sub> ] <sub>2</sub> Hf](μ-H){μ,η <sup>1</sup> ,η <sup>2</sup> -N(SiH <sub>2</sub> Cy)N}] ( <b>197</b> ) | [82]        |



## 5. Summary of used complexes and reagents for stoichiometric N-C bond formation.

**Table S5.** Summary of used complexes and reagents for stoichiometric N<sub>2</sub>-functionalization for N-C bond formation.

| Complex                                                                                                                                                                                                    | Reagent                                                                          | Selectivity                                                                                                                                                                                                                                                                       | Ref. |
|------------------------------------------------------------------------------------------------------------------------------------------------------------------------------------------------------------|----------------------------------------------------------------------------------|-----------------------------------------------------------------------------------------------------------------------------------------------------------------------------------------------------------------------------------------------------------------------------------|------|
| <i>trans</i> -[W(N <sub>2</sub> ) <sub>2</sub> (dppe) <sub>2</sub> ] ( <b>94</b> )                                                                                                                         | RCOBr {R = Me, Et, Ph, <i>p</i> -OMePh}                                          | <i>trans</i> -[W(N-NHC(O)R)(dppe) <sub>2</sub> Br <sub>2</sub> ] ( <b>201-204</b> ) (R = Et, Ph, <i>p</i> -OMePh)                                                                                                                                                                 | [83] |
| <i>trans</i> -[Mo(N <sub>2</sub> ) <sub>2</sub> (dppe) <sub>2</sub> ] ( <b>95</b> )                                                                                                                        | RCOCl {R = Me, Et}                                                               | <i>trans</i> -[Mo(N-NHC(O)R)(dppe) <sub>2</sub> Br <sub>2</sub> ] ( <b>205-206</b> )                                                                                                                                                                                              | [83] |
| <i>trans</i> -[W(N <sub>2</sub> ) <sub>2</sub> (dppe) <sub>2</sub> ] ( <b>94</b> )                                                                                                                         | R-X (R = Me, Et, <sup>n</sup> Pr, <sup>i</sup> Pr, <sup>t</sup> Bu., X = Cl, Br) | [(dppe) <sub>2</sub> W(-N=NR)] {R = Me, Et, <sup>n</sup> Pr, <sup>i</sup> Pr, <sup>t</sup> Bu} ( <b>207-211</b> )<br>[(dppe) <sub>2</sub> W(=N-NR <sub>2</sub> )] {R = Me} ( <b>214</b> )                                                                                         | [84] |
| <i>trans</i> -[Mo(N <sub>2</sub> ) <sub>2</sub> (dppe) <sub>2</sub> ] ( <b>95</b> )                                                                                                                        | R-X {R = Me, Et}                                                                 | [(dppe) <sub>2</sub> Mo(-N=NR)] {R = Me, Et} ( <b>212-213</b> )                                                                                                                                                                                                                   | [85] |
| <i>trans</i> -[W(N <sub>2</sub> ) <sub>2</sub> (dppe) <sub>2</sub> ] ( <b>94</b> )                                                                                                                         | ClCH <sub>2</sub> CH <sub>2</sub> CH <sub>2</sub> CH <sub>2</sub> Cl             | [(dppe) <sub>2</sub> W(=N-N(CH <sub>2</sub> ) <sub>4</sub> )] ( <b>215</b> )                                                                                                                                                                                                      | [86] |
| [(PhMe <sub>2</sub> P) <sub>3</sub> Re(N <sub>2</sub> )Cl <sub>2</sub> ]                                                                                                                                   | RCOCl (R = Me, Ph)                                                               | [(PhMe <sub>2</sub> P) <sub>3</sub> Re(N <sub>2</sub> COR)Cl <sub>2</sub> ]                                                                                                                                                                                                       | [84] |
| [M(PhB(CH <sub>2</sub> P <sup>Pr</sup> ) <sub>3</sub> )Cl]{M = Fe, Co} ( <b>216, 173</b> )                                                                                                                 | N <sub>2</sub> /Mg/MeOTs                                                         | M(PhB(CH <sub>2</sub> P <sup>Pr</sup> ) <sub>3</sub> )(N=NMe), M = Fe ( <b>218</b> ), Co ( <b>217</b> )                                                                                                                                                                           | [76] |
| [Fe(P <sub>3</sub> <sup>X</sup> )L] (L = Cl, Br) ( <b>219-220</b> )<br>(X = B, Si)                                                                                                                         | N <sub>2</sub> /Na(Hg)/MeOTf<br>N <sub>2</sub> /KC <sub>8</sub> /MeOTf           | Fe(P <sub>3</sub> <sup>X</sup> )(N-NMe <sub>2</sub> ) ( <b>221-222</b> )                                                                                                                                                                                                          | [87] |
| [Zr((η <sup>5</sup> -C <sub>5</sub> Me <sub>4</sub> R) <sub>2</sub> SiMe <sub>2</sub> ) <sub>2</sub> (μ-η <sup>2</sup> ,η <sup>2</sup> -N <sub>2</sub> )] ( <b>223</b> )                                   | CO <sub>2</sub>                                                                  | [Zr((η <sup>5</sup> -C <sub>5</sub> Me <sub>4</sub> R) <sub>2</sub> SiMe <sub>2</sub> ) <sub>2</sub> (μ-η <sup>2</sup> ,η <sup>2</sup> -OC(O)N-NOCO)] ( <b>224</b> )                                                                                                              | [88] |
| [[{(η <sup>5</sup> -C <sub>5</sub> Me <sub>4</sub> H) <sub>2</sub> Hf] <sub>2</sub> (μ <sub>2</sub> -η <sup>2</sup> ,η <sup>2</sup> -N <sub>2</sub> )] ( <b>225</b> )                                      | CO <sub>2</sub>                                                                  | [[{(η <sup>5</sup> -C <sub>5</sub> Me <sub>4</sub> H) <sub>2</sub> Hf] <sub>2</sub> {NN(CO) <sub>2</sub> }] ( <b>226</b> )                                                                                                                                                        | [89] |
| [[{(η <sup>5</sup> -C <sub>5</sub> Me <sub>4</sub> H) <sub>2</sub> Hf] <sub>2</sub> (μ <sub>2</sub> -η <sup>2</sup> ,η <sup>2</sup> -N <sub>2</sub> )] ( <b>225</b> )                                      | PhNCO                                                                            | [[{(η <sup>5</sup> -C <sub>5</sub> Me <sub>4</sub> H) <sub>2</sub> Hf] <sub>2</sub> (N <sub>5</sub> C <sub>3</sub> O <sub>3</sub> Ph <sub>3</sub> )]                                                                                                                              | [89] |
| [[{(η <sup>5</sup> -C <sub>5</sub> Me <sub>4</sub> H)Sc((NEt) <sub>2</sub> CNEt <sub>2</sub> ) <sub>2</sub> (μ <sub>2</sub> -η <sup>2</sup> ,η <sup>2</sup> -N <sub>2</sub> )] ( <b>227</b> )              | EtBr                                                                             | [[{(η <sup>5</sup> -C <sub>5</sub> Me <sub>4</sub> H)Sc((NEt) <sub>2</sub> CNEt <sub>2</sub> ) <sub>2</sub> (μ <sub>2</sub> -η <sup>2</sup> ,η <sup>2</sup> -N <sub>2</sub> Me)]                                                                                                  | [24] |
| [[{(η <sup>5</sup> -C <sub>5</sub> Me <sub>4</sub> H)Sc((N <sup>i</sup> Pr) <sub>2</sub> C <sup>t</sup> Bu) <sub>2</sub> (μ <sub>2</sub> -η <sup>2</sup> ,η <sup>2</sup> -N <sub>2</sub> )] ( <b>228</b> ) | Xs MeOTf                                                                         | [[{(η <sup>5</sup> -C <sub>5</sub> Me <sub>4</sub> H)Sc((N <sup>i</sup> Pr) <sub>2</sub> C <sup>t</sup> Bu) <sub>2</sub> (μ <sub>2</sub> -η <sup>2</sup> ,η <sup>2</sup> -(MeN-NMe))] ( <b>229</b> )                                                                              | [90] |
| [(μ-η <sup>1</sup> :η <sup>2</sup> -N <sub>2</sub> )Ta <sub>2</sub> (NPN) <sub>2</sub> (μ-H) <sub>2</sub> ] ( <b>190</b> )                                                                                 | PhCH <sub>2</sub> Br                                                             | [(NPN)Ta-(η <sup>1</sup> -NCH <sub>2</sub> Ph:μ <sup>2</sup> -N)(μ-H) <sub>2</sub> TaBr(NPN)] ( <b>231</b> )                                                                                                                                                                      | [91] |
| [(μ-η <sup>1</sup> :η <sup>2</sup> -N <sub>2</sub> )Ta <sub>2</sub> (NPN) <sub>2</sub> (μ-H) <sub>2</sub> ] ( <b>190</b> )                                                                                 | Ph-N=C=N-Ph<br>X=N=C=S                                                           | [(NPN)Ta-(μ-η <sup>1</sup> :η <sup>2</sup> -{κ <sup>2</sup> -N(Ph)C(N-Ph)N-N})(μ-H) <sub>2</sub> TaBr(NPN)]<br>[(NPN)(X=N=C=N)Ta-(μ-N)(μ-S)-Ta(NPN)]                                                                                                                              | [92] |
| [(P <sub>2</sub> N <sub>2</sub> )Zr-(μ-N <sub>2</sub> )-Zr(P <sub>2</sub> N <sub>2</sub> )] ( <b>159</b> )                                                                                                 | H-C≡C-Ar<br>Ar = Ph, <i>p</i> -MePh, <i>p</i> - <sup>t</sup> BuPh                | [(P <sub>2</sub> N <sub>2</sub> )Zr-(μ-η <sup>2</sup> :η <sup>2</sup> -N-N(CH=CHAr))(μ-C≡CPh)-Zr(P <sub>2</sub> N <sub>2</sub> )] ( <b>233-235</b> )                                                                                                                              | [93] |
| [(O <sub>3</sub> C) <sub>2</sub> Ti <sub>2</sub> (μ-N <sub>2</sub> )K <sub>3</sub> (thf) <sub>3</sub> ][K(thf) <sub>6</sub> ] ( <b>236</b> )<br>O <sub>3</sub> C = (σ-OPh) <sub>3</sub> C <sup>+</sup>     | CO <sub>2</sub><br><sup>t</sup> BuNCO                                            | [(O <sub>3</sub> C) <sub>2</sub> Ti <sub>2</sub> {μ-(κ <sup>2</sup> :κ <sup>2</sup> -(OCO) <sub>2</sub> N-N(COO-))}] ( <b>237</b> )<br>[(O <sub>3</sub> C) <sub>2</sub> Ti <sub>2</sub> {μ-(κ <sup>2</sup> :κ <sup>2</sup> -(N <sup>t</sup> BuCON) <sub>2</sub> }] ( <b>238</b> ) | [94] |

|                                                                                                                                                               |                       |                                                                                                                                                                                                                                                                                             |      |
|---------------------------------------------------------------------------------------------------------------------------------------------------------------|-----------------------|---------------------------------------------------------------------------------------------------------------------------------------------------------------------------------------------------------------------------------------------------------------------------------------------|------|
|                                                                                                                                                               | PhC=C=CH <sub>2</sub> | [(O <sub>3</sub> C) <sub>2</sub> Ti <sub>2</sub> {μ-η <sup>2</sup> :η <sup>2</sup> -NN(C(CH <sub>3</sub> )CHPh)}]<br>( <b>239</b> )or,<br>[(O <sub>3</sub> C) <sub>2</sub> Ti <sub>2</sub> {μ-η <sup>2</sup> :η <sup>2</sup> -NN(C(CH <sub>2</sub> )CH <sub>2</sub> Ph)}]<br>( <b>240</b> ) |      |
| [K <sub>3</sub> {[U(OR) <sub>3</sub> ] <sub>2</sub> (μ-N) (μ-η <sup>2</sup> :η <sup>2</sup> -N <sub>2</sub> )}]<br>(R = Si(O <sup>t</sup> Bu)) ( <b>147</b> ) | CO                    | KCN + [K <sub>2</sub> {[U(OR) <sub>3</sub> ] <sub>2</sub> (μ-O)(μ-NCO) <sub>2</sub> }]<br>( <b>241</b> )                                                                                                                                                                                    | [65] |
| [K <sub>2</sub> {[U(OR) <sub>3</sub> ] <sub>2</sub> (μ-O) (μ-η <sup>2</sup> :η <sup>2</sup> -N <sub>2</sub> )}] ( <b>243</b> )<br>(R = Si(O <sup>t</sup> Bu)) | CO                    | [K <sub>2</sub> {[U(OR) <sub>3</sub> ] <sub>2</sub> (μ-O) <sub>2</sub> (μ-NCN)}] ( <b>244</b> )<br>+'NCNCO' ( <i>not identified</i> )                                                                                                                                                       | [95] |

## 6. Summary of complexes and reagents for catalytic N<sub>2</sub> protonation.

**Table S6.** Molecular catalysts for N<sub>2</sub> protonation, conditions for highest TON reported

| Catalyst                                                                                                                                          | Reductant (equiv.) <sup>a</sup>           | Proton source (equiv.)                                     | Solvent           | Reaction conditions               | TON <sup>a</sup>  | Ref.  |
|---------------------------------------------------------------------------------------------------------------------------------------------------|-------------------------------------------|------------------------------------------------------------|-------------------|-----------------------------------|-------------------|-------|
| [[{(Tren <sup>TMS</sup> )Ti] <sub>2</sub> (μ-η <sup>1</sup> :η <sup>1</sup> :η <sup>2</sup> :η <sup>2</sup> N <sub>2</sub> K <sub>2</sub> )] (49) | KC <sub>8</sub> (600)                     | [Cy <sub>3</sub> PH]I (600)                                | Et <sub>2</sub> O | 1 atm of N <sub>2</sub> , - 78 °C | 9                 | [96]  |
| [V(OXyl)(PNP')(N <sub>2</sub> )] (262)                                                                                                            | KC <sub>8</sub> (200)                     | [HOEt <sub>2</sub> ][BAR <sup>F</sup> <sub>4</sub> ] (184) | Et <sub>2</sub> O | 1 atm of N <sub>2</sub> , - 78 °C | 6                 | [97]  |
| Mg[Mg <sub>2</sub> Mo <sub>8</sub> O <sub>22</sub> (OMe) <sub>8</sub> (MeOH) <sub>4</sub> ] (245)                                                 | Na/Hg                                     | solvent                                                    | Methanol          | 1 atm of N <sub>2</sub> , 20 °C   | 1000 <sup>b</sup> | [98]  |
| [Mo(N <sub>2</sub> )(HIPTN <sub>3</sub> N)] (246)                                                                                                 | CrCp <sup>+</sup> <sub>2</sub> (36)       | [LutH][BAR <sup>F</sup> <sub>4</sub> ]                     | Hexane            | 1 atm of N <sub>2</sub> , 25 °C   | 3.78              | [99]  |
| [Mo(N <sub>2</sub> ) <sub>2</sub> (PNP)] <sub>2</sub> (μ-N <sub>2</sub> ) (22)                                                                    | CoCp <sub>2</sub> (72)                    | [LutH][OTf] (96)                                           | Toluene           | 1 atm of N <sub>2</sub> , 25 °C   | 11.5              | [100] |
| [Mo(N)(PNP)Cl][OTf] (253)                                                                                                                         | CoCp <sub>2</sub> (36)                    | [LutH][OTf] (48)                                           | Toluene           | 1 atm of N <sub>2</sub> , 25 °C   | 3                 | [101] |
| [Mo(N <sub>2</sub> ) <sub>2</sub> (p-OMe-PNP)] <sub>2</sub> (μ-N <sub>2</sub> ) (254)                                                             | CoCp <sub>2</sub> (216)                   | [LutH][OTf] (288)                                          | Toluene           | 1 atm of N <sub>2</sub> , 25 °C   | 17                | [102] |
| [Mo(Cl <sub>3</sub> )(p-Ofc-PNP)](255)                                                                                                            | CoCp <sup>+</sup> <sub>2</sub> (360)      | [LutH][OTf] (480)                                          | Toluene           | 1 atm of N <sub>2</sub> , 25 °C   | 41.5              | [103] |
| [Mo(N <sub>2</sub> ) <sub>2</sub> (p-Fc-PNP)] <sub>2</sub> (μ-N <sub>2</sub> ) (256)                                                              | CoCp <sub>2</sub> (216)                   | [LutH][OTf] (288)                                          | Toluene           | 1 atm of N <sub>2</sub> , 25 °C   | 18.5              | [104] |
| [Mo(Cl <sub>3</sub> )(p-Ofc(PNP) <sub>2</sub> )](257)                                                                                             | CoCp <sup>+</sup> <sub>2</sub> (360)      | [LutH][OTf] (480)                                          | Toluene           | 1 atm of N <sub>2</sub> , 25 °C   | 22                | [103] |
| [Mo(N)(PPP)Cl] (26)                                                                                                                               | CoCp <sup>+</sup> <sub>2</sub> (36)       | [CoIH][OTf] (48)                                           | Toluene           | 1 atm of N <sub>2</sub> , 25 °C   | 5.5               | [105] |
| [Mo(N <sub>2</sub> ) <sub>2</sub> (PCP)] <sub>2</sub> (μ-N <sub>2</sub> ) (263)                                                                   | CrCp <sup>+</sup> <sub>2</sub> (72)       | [LutH][OTf] (96)                                           | Toluene           | 1 atm of N <sub>2</sub> , 25 °C   | 58                | [106] |
| [Mo <sub>3</sub> (PNP)] (20)                                                                                                                      | CoCp <sup>+</sup> <sub>2</sub> (180)      | [CoIH][OTf] (180)                                          | Toluene           | 1 atm of N <sub>2</sub> , 25 °C   | 26                | [9]   |
| [Mo(N)(PNP)] (21)                                                                                                                                 | CoCp <sup>+</sup> <sub>2</sub> (180)      | [CoIH][OTf] (180)                                          | Toluene           | 1 atm of N <sub>2</sub> , 25 °C   | 6.1               | [9]   |
| [Mo <sub>3</sub> (PNP)] (20)                                                                                                                      | Sml <sub>2</sub> (360)                    | HOCH <sub>2</sub> CH <sub>2</sub> OH (360)                 | THF               | 1 atm of N <sub>2</sub> , 25 °C   | 21.4              | [10]  |
| [Mo <sub>2</sub> (PNP')] (258)                                                                                                                    | Sml <sub>2</sub> (thf) <sub>2</sub> (180) | HOCH <sub>2</sub> CH <sub>2</sub> OH (180)                 | THF               | 1 atm of N <sub>2</sub> , 25 °C   | 6.1               | [107] |
| [Mo(N <sub>2</sub> ) <sub>2</sub> (PCP)] <sub>2</sub> (μ-N <sub>2</sub> ) (263)                                                                   | Sml <sub>2</sub> (360)                    | HOCH <sub>2</sub> CH <sub>2</sub> OH (360)                 | THF               | 1 atm of N <sub>2</sub> , 25 °C   | 18                | [10]  |
| [Mo(N <sub>2</sub> ) <sub>2</sub> (PCP)] <sub>2</sub> (μ-N <sub>2</sub> ) (263)                                                                   | Sml <sub>2</sub> (14400)                  | H <sub>2</sub> O (14400)                                   | THF               | 1 atm of N <sub>2</sub> , 25 °C   | 2175              | [10]  |
| [Fe(PNP')(N <sub>2</sub> )] (260)                                                                                                                 | KC <sub>8</sub> (40)                      | [HOEt <sub>2</sub> ][BAR <sup>F</sup> <sub>4</sub> ] (38)  | Et <sub>2</sub> O | 1 atm of N <sub>2</sub> , - 78 °C | 3.5               | [108] |
| [Na(12-crown-4)] <sub>2</sub> [Fe(P <sub>3</sub> <sup>B</sup> )(N <sub>2</sub> )] (264)                                                           | KC <sub>8</sub> (50)                      | [HOEt <sub>2</sub> ][BAR <sup>F</sup> <sub>4</sub> ] (46)  | Et <sub>2</sub> O | 1 atm of N <sub>2</sub> , - 78 °C | 3.5               | [109] |
| [Na(12-crown-4)] <sub>2</sub> [Fe(P <sub>3</sub> <sup>B</sup> )(N <sub>2</sub> )] (264)                                                           | CoCp <sup>+</sup> <sub>2</sub> (486)      | [H <sub>2</sub> NPh <sub>2</sub> ][OTf] (966)              | Et <sub>2</sub> O | 1 atm of N <sub>2</sub> , - 78 °C | 6.4               | [110] |
| [K(Et <sub>2</sub> O) <sub>0.5</sub> ][Fe(P <sub>3</sub> <sup>C</sup> )(N <sub>2</sub> )] (265)                                                   | KC <sub>8</sub> (40)                      | [HOEt <sub>2</sub> ][BAR <sup>F</sup> <sub>4</sub> ] (38)  | Et <sub>2</sub> O | 1 atm of N <sub>2</sub> , - 78 °C | 2.3               | [111] |

|                                                                                                      |                              |                                                             |                   |                                               |                   |       |
|------------------------------------------------------------------------------------------------------|------------------------------|-------------------------------------------------------------|-------------------|-----------------------------------------------|-------------------|-------|
| [Na(12-crown-4) <sub>2</sub> ][Fe(P <sub>3</sub> Si)(N <sub>2</sub> )]<br>( <b>266</b> )             | KC <sub>8</sub> (1800)       | [HOEt <sub>2</sub> ][BAr <sup>F</sup> <sub>4</sub> ] (1500) | Et <sub>2</sub> O | 1 atm of N <sub>2</sub> , - 78 °C             | 1.9               | [112] |
| [K(thf) <sub>2</sub> ][Ru(P <sub>3</sub> Si)(N <sub>2</sub> )]                                       | KC <sub>8</sub> (50)         | [HOEt <sub>2</sub> ][BAr <sup>F</sup> <sub>4</sub> ] (46)   | Et <sub>2</sub> O | 1 atm of N <sub>2</sub> , - 78 °C             | 2.2               | [113] |
| [K(thf) <sub>2</sub> ][Os(P <sub>3</sub> Si)(N <sub>2</sub> )]                                       | CoCp* <sub>2</sub><br>(1800) | [H <sub>2</sub> NPh <sub>2</sub> ][OTf] (1500)              | Et <sub>2</sub> O | 1 atm of N <sub>2</sub> , - 78 °C             | 60                | [113] |
| [FeH(PPP) <sub>2</sub> ](N <sub>2</sub> ) ( <b>268</b> )                                             | KC <sub>8</sub> (3600)       | [HOEt <sub>2</sub> ][BAr <sup>F</sup> <sub>4</sub> ] (3000) | Et <sub>2</sub> O | 1 atm of N <sub>2</sub> , - 78 °C,<br>Hg lamp | 33.4              | [114] |
| [Fe(N <sub>2</sub> )(P <sup>Ph</sup> P <sub>2</sub> <sup>Cy</sup> )(H) <sub>2</sub> ] ( <b>268</b> ) | KC <sub>8</sub> (200)        | [HOEt <sub>2</sub> ][BAr <sup>F</sup> <sub>4</sub> ] (200)  | Et <sub>2</sub> O | 1 atm of N <sub>2</sub> , - 80 °C             | 1.4               | [115] |
| [Fe(CAAC) <sub>2</sub> ][BAr <sup>F</sup> <sub>4</sub> ] ( <b>269</b> )                              | KC <sub>8</sub> (50)         | [HOEt <sub>2</sub> ][BAr <sup>F</sup> <sub>4</sub> ] (50)   | Et <sub>2</sub> O | 1 atm of N <sub>2</sub> , - 95 °C             | 1.7               | [116] |
| [Fe(depe) <sub>2</sub> N <sub>2</sub> ] ( <b>270</b> )                                               | CoCp* <sub>2</sub> (270)     | [H <sub>2</sub> NPh <sub>2</sub> ][OTf] (360)               | Et <sub>2</sub> O | 1 atm of N <sub>2</sub> , - 78 °C             | 12.3 <sup>c</sup> | [117] |
| [Co(PNP')(N <sub>2</sub> )] ( <b>261</b> )                                                           | KC <sub>8</sub> (40)         | [HOEt <sub>2</sub> ][BAr <sup>F</sup> <sub>4</sub> ] (38)   | Et <sub>2</sub> O | 1 atm of N <sub>2</sub> , - 78 °C             | 2.2               | [118] |

[a] equivalents per catalyst. [b] based on the equivalents of reductant. [c] in N<sub>2</sub>H<sub>4</sub>

## 7. Summary of complexes and reagents for catalytic N<sub>2</sub> silylation

**Table S7.** Molecular catalysts for N<sub>2</sub> silylation, conditions for highest TON reported.

| Catalyst                                                                                                                                                     | Reductant (equiv.) <sup>a</sup> | Silyl source (equiv.)                   | Solvent           | Reaction condition:             | TON <sup>a</sup> | Ref.  |
|--------------------------------------------------------------------------------------------------------------------------------------------------------------|---------------------------------|-----------------------------------------|-------------------|---------------------------------|------------------|-------|
| K <sub>2</sub> {[(Xy-N <sub>3</sub> N)Ti] <sub>2</sub> (μ <sub>2</sub> -N <sub>2</sub> )]} (306)                                                             | K (1500)                        | Me <sub>3</sub> SiCl (1500)             | THF               | 1 atm of N <sub>2</sub> , 50 °C | 6.3              | [119] |
| [V{(Me <sub>3</sub> SiNCH <sub>2</sub> CH <sub>2</sub> ) <sub>2</sub> NSiMe <sub>3</sub> }(μ-N)] <sub>2</sub> (38)                                           | Na (600)                        | Me <sub>3</sub> SiCl (600)              | THF               | 1 atm of N <sub>2</sub> , 25 °C | 11.5             | [120] |
| K[V{(Me <sub>3</sub> SiNCH <sub>2</sub> CH <sub>2</sub> ) <sub>2</sub> NSiMe <sub>3</sub> }(μ-N)] <sub>2</sub> (39)                                          | Na (600)                        | Me <sub>3</sub> SiCl (600)              | THF               | 1 atm of N <sub>2</sub> , 25 °C | 12               | [120] |
| [V{(Me <sub>3</sub> SiNCH <sub>2</sub> CH <sub>2</sub> ) <sub>2</sub> NSiMe <sub>3</sub> }(μ-Cl)] <sub>2</sub>                                               | Na (600)                        | Me <sub>3</sub> SiCl (600)              | THF               | 1 atm of N <sub>2</sub> , 25 °C | 5.5              | [120] |
| [VCl(N(SiMe <sub>3</sub> ) <sub>2</sub> )(thf)]                                                                                                              | Na (600)                        | Me <sub>3</sub> SiCl (600)              | THF               | 1 atm of N <sub>2</sub> , 25 °C | 5.5              | [120] |
| [VCl <sub>2</sub> (tmeda) <sub>2</sub> ] (307)                                                                                                               | Na (600)                        | Me <sub>3</sub> SiCl (600)              | THF               | 1 atm of N <sub>2</sub> , 25 °C | 6                | [120] |
| [Na(thf)][V(N <sub>2</sub> ) <sub>2</sub> (dppe) <sub>2</sub> ] (308)                                                                                        | Na (600)                        | Me <sub>3</sub> SiCl (600)              | THF               | 1 atm of N <sub>2</sub> , 25 °C | 10.5             | [120] |
| [CrCl <sub>3</sub> ]                                                                                                                                         | Li (50)                         | Me <sub>3</sub> SiCl (50)               | THF               | 1 atm of N <sub>2</sub> , 25 °C | 2.7              | [121] |
| [Cr(N <sub>2</sub> ) <sub>2</sub> (P <sup>Ph</sup> <sub>4</sub> N <sup>Bn</sup> <sub>4</sub> )] (130)                                                        | Na (10 <sup>5</sup> )           | Me <sub>3</sub> SiCl (10 <sup>5</sup> ) | THF               | 1 atm of N <sub>2</sub> , 25 °C | 17               | [55]  |
| [Cr(Cy <sub>2</sub> PC <sub>6</sub> H <sub>4</sub> -(η <sup>5</sup> -C <sub>5</sub> H <sub>4</sub> Et <sub>4</sub> )(N <sub>2</sub> ) <sub>2</sub> )] (275)  | K (2000)                        | Me <sub>3</sub> SiCl (2000)             | Et <sub>2</sub> O | 1 atm of N <sub>2</sub> , 25 °C | 13               | [122] |
| <i>trans</i> -[W(N <sub>2</sub> ) <sub>2</sub> (dppe) <sub>2</sub> ] (94)                                                                                    | Na (100)                        | Me <sub>3</sub> SiCl (100)              | THF               | 1 atm of N <sub>2</sub> , 30 °C | 1.7              | [123] |
| <i>trans</i> -[Mo(N <sub>2</sub> ) <sub>2</sub> (dppe) <sub>2</sub> ] (95)                                                                                   | Na (100)                        | Me <sub>3</sub> SiCl (100)              | THF               | 1 atm of N <sub>2</sub> , 30 °C | 4.9              | [123] |
| [Mo(N <sub>2</sub> ) <sub>2</sub> (PMe <sub>2</sub> Ph) <sub>4</sub> ] (124)                                                                                 | Na (200)                        | Me <sub>3</sub> SiCl (200)              | THF               | 1 atm of N <sub>2</sub> , 30 °C | 18.3             | [123] |
| [Mo(N <sub>2</sub> ) <sub>2</sub> (depf) <sub>2</sub> ] (106)                                                                                                | Na (8000)                       | Me <sub>3</sub> SiCl (8000)             | THF               | 1 atm of N <sub>2</sub> , 25 °C | 226              | [124] |
| [Mo(PP <sup>Cy</sup> <sub>3</sub> )Cl][BPh <sub>4</sub> ] (276)                                                                                              | K (200)                         | Me <sub>3</sub> SiCl (200)              | THF               | 1 atm of N <sub>2</sub> , 50 °C | 5.9              | [125] |
| [Mo(PP <sup>Cy</sup> <sub>3</sub> )=(N-N(SiMe <sub>3</sub> ) <sub>2</sub> )] (278)                                                                           | K (200)                         | Me <sub>3</sub> SiCl (200)              | THF               | 1 atm of N <sub>2</sub> , 50 °C | 7.5              | [125] |
| [Mo(PP <sup>Cy</sup> <sub>3</sub> )=(N(SiMe <sub>3</sub> ))] (279)                                                                                           | K (200)                         | Me <sub>3</sub> SiCl (200)              | THF               | 1 atm of N <sub>2</sub> , 50 °C | 5.9              | [125] |
| [Mo(PPP)Cl <sub>3</sub> ] (28)                                                                                                                               | K (400)                         | Me <sub>3</sub> SiCl (400)              | THF               | 1 atm of N <sub>2</sub> , 25 °C | 19.2             | [126] |
| [[Mo(PMe <sub>3</sub> )Cp*] <sub>2</sub> (μ <sub>2</sub> -H) <sub>8</sub> {FeN(SiMe <sub>3</sub> ) <sub>2</sub> }] (295)                                     | Na (600)                        | Me <sub>3</sub> SiCl (600)              | THF               | 1 atm of N <sub>2</sub> , 25 °C | 34.5             | [127] |
| [[Mo(PMe <sub>3</sub> )Cp*] <sub>2</sub> (μ <sub>2</sub> -H) <sub>8</sub> {MnN(SiMe <sub>3</sub> ) <sub>2</sub> }] (296)                                     | Na (600)                        | Me <sub>3</sub> SiCl (600)              | THF               | 1 atm of N <sub>2</sub> , 25 °C | 6                | [127] |
| [[Mo(PMe <sub>3</sub> )Cp*] <sub>2</sub> (μ <sub>2</sub> -H) <sub>8</sub> {FeS(2,4,6- <sup>t</sup> Pr <sub>3</sub> C <sub>6</sub> H <sub>2</sub> )}] (297)   | Na (600)                        | Me <sub>3</sub> SiCl (600)              | THF               | 1 atm of N <sub>2</sub> , 25 °C | 32.5             | [127] |
| [[Mo(PMe <sub>3</sub> )Cp*] <sub>2</sub> (μ <sub>2</sub> -H) <sub>8</sub> {FeS(2,6-(SiMe <sub>3</sub> ) <sub>2</sub> C <sub>6</sub> H <sub>3</sub> )}] (298) | Na (600)                        | Me <sub>3</sub> SiCl (600)              | THF               | 1 atm of N <sub>2</sub> , 25 °C | 34.5             | [127] |

|                                                                                                                                                                                                |                        |                             |                   |                                                     |      |       |
|------------------------------------------------------------------------------------------------------------------------------------------------------------------------------------------------|------------------------|-----------------------------|-------------------|-----------------------------------------------------|------|-------|
| [Fe(CO) <sub>5</sub> ]                                                                                                                                                                         | Na (600)               | Me <sub>3</sub> SiCl (600)  | THF               | 1 atm of N <sub>2</sub> , 25 °C                     | 12.5 | [128] |
| [Fe(SiMe <sub>3</sub> ) <sub>2</sub> (CO) <sub>4</sub> ]                                                                                                                                       | Na (600)               | Me <sub>3</sub> SiCl (600)  | THF               | 1 atm of N <sub>2</sub> , 25 °C                     | 14.5 | [128] |
| [FeCp(CO) <sub>2</sub> ] <sub>2</sub>                                                                                                                                                          | Na (600)               | Me <sub>3</sub> SiCl (600)  | THF               | 1 atm of N <sub>2</sub> , 25 °C                     | 8.5  | [128] |
| [FeCp <sub>2</sub> ]                                                                                                                                                                           | Na (600)               | Me <sub>3</sub> SiCl (600)  | THF               | 1 atm of N <sub>2</sub> , 25 °C                     | 6.5  | [128] |
| [Fe(η <sup>5</sup> -C <sub>5</sub> H <sub>4</sub> SiMe <sub>3</sub> ) <sub>2</sub> ]                                                                                                           | Na (600)               | Me <sub>3</sub> SiCl (600)  | THF               | 1 atm of N <sub>2</sub> , 25 °C                     | 11.5 | [128] |
| [Fe(η <sup>5</sup> -C <sub>5</sub> H <sub>2</sub> (SiMe <sub>3</sub> ) <sub>3</sub> ) <sub>2</sub> ]                                                                                           | Na (600)               | Me <sub>3</sub> SiCl (600)  | THF               | 1 atm of N <sub>2</sub> , 25 °C                     | 17   | [128] |
| [Fe(PSiP)H(PMe <sub>3</sub> ) <sub>2</sub> ] ( <b>285</b> )                                                                                                                                    | Na (600)               | Me <sub>3</sub> SiCl (600)  | THF               | 1 atm of N <sub>2</sub> , 25 °C                     | 13   | [129] |
| [Fe[SiCHSi](H)(N <sub>2</sub> )(PMe <sub>3</sub> )] ( <b>287</b> )                                                                                                                             | KC <sub>8</sub> (1800) | Me <sub>3</sub> SiCl (1800) | Dioxane           | 1 atm of N <sub>2</sub> , 25 °C                     | 37.2 | [130] |
| [Fe(CAAC) <sub>2</sub> ][BAF <sub>4</sub> ] ( <b>269</b> )                                                                                                                                     | KC <sub>8</sub> (600)  | Me <sub>3</sub> SiCl (600)  | Et <sub>2</sub> O | 1 atm of N <sub>2</sub> , 25 °C                     | 12.2 | [116] |
| [Fe(depe) <sub>2</sub> N <sub>2</sub> ] ( <b>270</b> )                                                                                                                                         | KC <sub>8</sub> (1500) | Me <sub>3</sub> SiCl (1500) | Et <sub>2</sub> O | 1 atm of N <sub>2</sub> , 25 °C                     | 60.5 | [131] |
| [Fe(P <sub>4</sub> N <sub>2</sub> ) <sub>2</sub> ] ( <b>289</b> )                                                                                                                              | KC <sub>8</sub> (500)  | Me <sub>3</sub> SiCl (500)  | Toluene           | 1 atm of N <sub>2</sub> , 25 °C                     | 5.5  | [132] |
| [Fe(N <sub>2</sub> )(P <sup>Ph</sup> P <sub>2</sub> <sup>Cy</sup> )(H) <sub>2</sub> ]                                                                                                          | K (600)                | Me <sub>3</sub> SiCl (600)  | THF               | 1 atm of N <sub>2</sub> , 25 °C                     | 14.5 | [115] |
| [Fe(N <sub>2</sub> ) <sub>2</sub> (P <sup>Ph</sup> P <sub>2</sub> <sup>Cy</sup> ) ( <b>290</b> )                                                                                               | K (600)                | Me <sub>3</sub> SiCl (600)  | THF               | 1 atm of N <sub>2</sub> , 25 °C                     | 16   | [115] |
| [Fe(N <sub>2</sub> ) <sub>2</sub> (P <sup>Bu</sup> P <sub>2</sub> <sup>Cy</sup> ) ( <b>291</b> )                                                                                               | K (600)                | Me <sub>3</sub> SiCl (600)  | THF               | 1 atm of N <sub>2</sub> , 25 °C                     | 7.3  | [115] |
| [Fe <sub>3</sub> (cyclophane-β-diketamin)Br <sub>2</sub> ] ( <b>54</b> )                                                                                                                       | KC <sub>8</sub> (500)  | Me <sub>3</sub> SiCl (500)  | Et <sub>2</sub> O | 1 atm of N <sub>2</sub> , - 34 °C                   | 41.5 | [133] |
| [Fe <sub>4</sub> (μ-H) <sub>4</sub> (μ <sub>3</sub> -H) <sub>2</sub> {N(SiMe <sub>3</sub> ) <sub>2</sub> } <sub>2</sub> (PMe <sub>3</sub> ) <sub>4</sub> ] ( <b>292</b> )                      | Na (600)               | Me <sub>3</sub> SiCl (600)  | DME               | 1 atm of N <sub>2</sub> , 25 °C                     | 80   | [134] |
| [Fe <sub>6</sub> (μ-H) <sub>10</sub> (μ <sub>3</sub> -H) <sub>2</sub> (PMe <sub>3</sub> ) <sub>10</sub> ] ( <b>293</b> )                                                                       | Na (600)               | Me <sub>3</sub> SiCl (600)  | DME               | 1 atm of N <sub>2</sub> , 25 °C                     | 91.5 | [134] |
| [Fe <sub>4</sub> (η <sup>6</sup> -C <sub>7</sub> H <sub>8</sub> )(μ-H) <sub>2</sub> {μ-N(SiMe <sub>3</sub> ) <sub>2</sub> } <sub>2</sub> {N(SiMe <sub>3</sub> ) <sub>2</sub> }] ( <b>294</b> ) | Na (600)               | Me <sub>3</sub> SiCl (600)  | DME               | 1 atm of N <sub>2</sub> , 25 °C                     | 74   | [134] |
| [Fe <sub>4</sub> (μ-H) <sub>4</sub> (μ <sub>3</sub> -H) <sub>2</sub> (SDmp) <sub>2</sub> (PMe <sub>3</sub> ) <sub>4</sub> ]                                                                    | Na (600)               | Me <sub>3</sub> SiCl (600)  | DME               | 1 atm of N <sub>2</sub> , 25 °C                     | 52   | [134] |
| [Co <sub>2</sub> (CO) <sub>8</sub> ]                                                                                                                                                           | Na (600)               | Me <sub>3</sub> SiCl (600)  | DME               | 1 atm of N <sub>2</sub> , 25 °C                     | 18   | [135] |
| [Co <sub>2</sub> (CO) <sub>8</sub> ]                                                                                                                                                           | Na (600)               | Me <sub>3</sub> SiCl (600)  | DME               | 1 atm of N <sub>2</sub> , 25 °C<br>+ 2 equiv. bipy. | 20   | [135] |
| [Co(SiMe <sub>3</sub> )(CO) <sub>4</sub> ]                                                                                                                                                     | Na (600)               | Me <sub>3</sub> SiCl (600)  | DME               | 1 atm of N <sub>2</sub> , 25 °C                     | 18   | [135] |
| [CoCp <sub>2</sub> ]                                                                                                                                                                           | Na (600)               | Me <sub>3</sub> SiCl (600)  | DME               | 1 atm of N <sub>2</sub> , 25 °C                     | 4    | [135] |
| [Co <sub>2</sub> (P <sub>3</sub> N <sub>3</sub> )] ( <b>299</b> )                                                                                                                              | KC <sub>8</sub> (2000) | Me <sub>3</sub> SiCl (2000) | THF               | 1 atm of N <sub>2</sub> , 25 °C                     | 195  | [135] |
| [Co(ICy) <sub>2</sub> (N <sub>2</sub> )] ( <b>300</b> )                                                                                                                                        | KC <sub>8</sub> (2000) | Me <sub>3</sub> SiCl (2000) | Et <sub>2</sub> O | 1 atm of N <sub>2</sub> , 25 °C                     | 125  | [136] |
| [Co(NpNP)] ( <b>302</b> )                                                                                                                                                                      | KC <sub>8</sub> (1500) | Me <sub>3</sub> SiCl (2000) | THF               | 1 atm of N <sub>2</sub> , - 40 °C                   | 100  | [137] |
| [Co(QuiNacNacP)Cl] ( <b>303</b> )                                                                                                                                                              | KC <sub>8</sub> (1000) | Me <sub>3</sub> SiCl (1500) | THF               | 1 atm of N <sub>2</sub> , 25 °C                     | 38   | [138] |

|                                                                                                                                                |                       |                                         |                               |                                   |                  |       |
|------------------------------------------------------------------------------------------------------------------------------------------------|-----------------------|-----------------------------------------|-------------------------------|-----------------------------------|------------------|-------|
| [Co(PSiP)(PMePh <sub>2</sub> )N <sub>2</sub> ] ( <b>304</b> )                                                                                  | Na (600)              | Me <sub>3</sub> SiCl (600)              | THF                           | 1 atm of N <sub>2</sub> , 25 °C   | 20.5             | [129] |
| [Rh(PNP')N <sub>2</sub> ] ( <b>305</b> )                                                                                                       | KC <sub>8</sub> (600) | Me <sub>3</sub> SiCl (600)              | THF                           | 1 atm of N <sub>2</sub> , - 40 °C | 11.5             | [139] |
| [U <sub>2</sub> ( <i>m</i> TP) <sub>2</sub> ] ( <b>309</b> )                                                                                   | K (85)                | Me <sub>3</sub> SiCl (60)               | C <sub>6</sub> H <sub>6</sub> | 1 atm of N <sub>2</sub> , 25 °C   | 3.2 <sup>c</sup> | [64]  |
| <i>m</i> TP = [{2-(OC <sub>6</sub> H <sub>2</sub> - <sup>t</sup> Bu-2,Me-4) <sub>2</sub> CH}-C <sub>6</sub> H <sub>4</sub> -1,3] <sup>4-</sup> |                       | [HNEt <sub>3</sub> ][BPh <sub>4</sub> ] |                               |                                   |                  |       |

[a] equivalents per catalyst. [b] based on the equivalents of reductant. [c] in HMDS

## 8. References

- [1] C. E. Laplaza, C. C. Cummins, *Science* **1995**, *268*, 861-863.
- [2] A. S. Huss, J. J. Curley, C. C. Cummins, D. A. Blank, *J. Phys. Chem. B* **2013**, *117*, 1429-1436.
- [3] M. Pucino, F. Allouche, C. P. Gordon, M. Wrte, V. Mougel, C. Coperet, *Chem. Sci.* **2019**, *10*, 6362-6367.
- [4] T. Shima, S. Hu, G. Luo, X. Kang, Y. Luo, Z. Hou, *Science* **2013**, *340*, 1549-1552.
- [5] F. Akagi, T. Matsuo, H. Kawaguchi, *Angew. Chem. Int. Ed.* **2007**, *46*, 8778-8781.
- [6] A. Zanotti-Gerosa, E. Solari, L. Giannini, C. Floriani, A. Chiesi-Villa, C. Rizzoli, *J. Am. Chem. Soc.* **1998**, *120*, 437-438.
- [7] A. Caselli, E. Solari, R. Scopelliti, C. Floriani, N. Re, C. Rizzoli, A. Chiesi-Villa, *J. Am. Chem. Soc.* **2000**, *122*, 3652-3670.
- [8] T. J. Hebden, R. R. Schrock, M. K. Takase, P. Muller, *Chem. Commun.* **2012**, *48*, 1851-1853.
- [9] K. Arashiba, A. Eizawa, H. Tanaka, K. Nakajima, K. Yoshizawa, Y. Nishibayashi, *Bulletin of the Chemical Society of Japan* **2017**, *90*, 1111-1118.
- [10] Y. Ashida, K. Arashiba, K. Nakajima, Y. Nishibayashi, *Nature* **2019**, *568*, 536-540.
- [11] G. A. Silantyev, M. Forster, B. Schlusshass, J. Abbenseth, C. Wurtele, C. Volkmann, M. C. Holthausen, S. Schneider, *Angew. Chem. Int. Ed.* **2017**, *56*, 5872-5876.
- [12] B. Schlusshass, J. Abbenseth, S. Demeshko, M. Finger, A. Franke, C. Herwig, C. Wurtele, I. Ivanovic-Burmazovic, C. Limberg, J. Telsner, S. Schneider, *Chem. Sci.* **2019**, *10*, 10275-10282.
- [13] Q. Liao, A. Cavaille, N. Saffon-Merceron, N. Mezaillies, *Angew. Chem. Int. Ed.* **2016**, *55*, 11212-11216.
- [14] B. M. Lindley, R. S. van Alten, M. Finger, F. Schendzielorz, C. Wurtele, A. J. M. Miller, I. Siewert, S. Schneider, *J. Am. Chem. Soc.* **2018**, *140*, 7922-7935.
- [15] R. S. van Alten, F. Watjen, S. Demeshko, A. J. M. Miller, C. Wurtele, I. Siewert, S. Schneider, *Eur. J. Inorg. Chem.* **2020**, *2020*, 1402-1410.
- [16] G. K. B. Clentsmith, V. M. E. Bates, P. B. Hitchcock, F. G. N. Cloke, *J. Am. Chem. Soc.* **1999**, *121*, 10444-10445.
- [17] I. Korobkov, S. Gambarotta, G. P. Yap, *Angew. Chem. Int. Ed.* **2002**, *41*, 3433-3436.
- [18] H. Kawaguchi, T. Matsuo, *Angew. Chem. Int. Ed.* **2002**, *41*, 2792-2794.
- [19] Y. Ishida, H. Kawaguchi, *J. Am. Chem. Soc.* **2014**, *136*, 16990-16993.
- [20] L. R. Doyle, A. J. Wooles, S. T. Liddle, *Angew. Chem. Int. Ed.* **2019**, *58*, 6674-6677.
- [21] M. M. Rodriguez, E. Bill, W. W. Brennessel, P. L. Holland, *Science* **2011**, *334*, 780-783.
- [22] K. Grubel, W. W. Brennessel, B. Q. Mercado, P. L. Holland, *J. Am. Chem. Soc.* **2014**, *136*, 16807-16816.
- [23] Y. Lee, F. T. Sloane, G. Blondin, K. A. Abboud, R. Garcia-Serres, L. J. Murray, *Angew. Chem. Int. Ed.* **2015**, *54*, 1499-1503.
- [24] M. Hirotsu, P. P. Fontaine, A. Epshteyn, P. Y. Zavalij, L. R. Sita, *J. Am. Chem. Soc.* **2007**, *129*, 9284-9285.
- [25] A. J. Keane, B. L. Yonke, M. Hirotsu, P. Y. Zavalij, L. R. Sita, *J. Am. Chem. Soc.* **2014**, *136*, 9906-9909.
- [26] L. M. Duman, W. S. Farrell, P. Y. Zavalij, L. R. Sita, *J. Am. Chem. Soc.* **2016**, *138*, 14856-14859.
- [27] E. Solari, C. Da Silva, B. Iacono, J. Hesschenbrouck, C. Rizzoli, R. Scopelliti, C. Floriani, *Angew. Chem. Int. Ed.* **2001**, *40*, 3907-3909.
- [28] Q. J. Bruch, G. P. Connor, C. H. Chen, P. L. Holland, J. M. Mayer, F. Hasanayn, A. J. M. Miller, *J. Am. Chem. Soc.* **2019**, *141*, 20198-20208.
- [29] T. Miyazaki, H. Tanaka, Y. Tanabe, M. Yuki, K. Nakajima, K. Yoshizawa, Y. Nishibayashi, *Angew. Chem. Int. Ed.* **2014**, *53*, 11488-11492.
- [30] A. J. Keane, W. S. Farrell, B. L. Yonke, P. Y. Zavalij, L. R. Sita, *Angew. Chem. Int. Ed.* **2015**, *54*, 10220-10224.
- [31] A. Katayama, T. Ohta, Y. Wasada-Tsutsui, T. Inomata, T. Ozawa, T. Ogura, H. Masuda, *Angew. Chem. Int. Ed.* **2019**, *58*, 11279-11284.
- [32] E. L. Sceats, J. S. Figueroa, C. C. Cummins, N. M. Loening, P. Van der Wel, R. G. Griffin, *Polyhedron* **2004**, *23*, 2751-2768.
- [33] J. S. Figueroa, N. A. Piro, C. R. Clough, C. C. Cummins, *J. Am. Chem. Soc.* **2006**, *128*, 940-950.
- [34] H. Henderickx, G. Kwakkenbos, A. Peters, J. van der Spoel, K. de Vries, *Chem. Commun.* **2003**, 2050-2051.
- [35] J. J. Curley, E. L. Sceats, C. C. Cummins, *J. Am. Chem. Soc.* **2006**, *128*, 14036-14037.
- [36] F. Akagi, S. Suzuki, Y. Ishida, T. Hatanaka, T. Matsuo, H. Kawaguchi, *Eur. J. Inorg. Chem.* **2013**, *2013*, 3930-3936.
- [37] B. L. Yonke, J. P. Reeds, P. P. Fontaine, P. Y. Zavalij, L. R. Sita, *Organometallics* **2014**, *33*, 3239-3242.
- [38] I. Klopsch, M. Finger, C. Wurtele, B. Milde, D. B. Werz, S. Schneider, *J. Am. Chem. Soc.* **2014**, *136*, 6881-6883.
- [39] I. Klopsch, M. Kinauer, M. Finger, C. Wurtele, S. Schneider, *Angew. Chem. Int. Ed.* **2016**, *55*, 4786-4789.
- [40] I. Klopsch, F. Schendzielorz, C. Volkmann, C. Wurtele, S. Schneider, *Zeitschrift Fur Anorganische Und Allgemeine Chemie* **2018**, *644*, 916-919.
- [41] F. Schendzielorz, M. Finger, J. Abbenseth, C. Wurtele, V. Krewald, S. Schneider, *Angew. Chem. Int. Ed.* **2019**, *58*, 830-834.
- [42] M. M. Guru, T. Shima, Z. Hou, *Angew. Chem. Int. Ed.* **2016**, *55*, 12316-12320.
- [43] L. M. Duman, L. R. Sita, *J. Am. Chem. Soc.* **2017**, *139*, 17241-17244.
- [44] J. Chatt, G. A. Heath, R. L. Richards, *J. Chem. Soc., Chem. Commun.* **1972**, 1010-1011.
- [45] J. Chatt, G. A. Heath, R. L. Richards, *J. Chem. Soc., Dalton Trans.* **1974**, 2074-2082.
- [46] M. Yuki, Y. Miyake, Y. Nishibayashi, I. Wakiji, M. Hidai, *Organometallics* **2008**, *27*, 3947-3953.
- [47] M. Yuki, T. Midorikawa, Y. Miyake, Y. Nishibayashi, *Organometallics* **2009**, *28*, 4741-4746.
- [48] M. Yuki, Y. Miyake, Y. Nishibayashi, *Organometallics* **2009**, *28*, 5821-5827.
- [49] J. Chatt, A. J. Pearman, R. L. Richards, *Nature* **1975**, *253*, 39-40.
- [50] T. Takahashi, Y. Mizobe, M. Sato, Y. Uchida, M. Hidai, *J. Am. Chem. Soc.* **1980**, *102*, 7461-7467.
- [51] J. A. Baumann, T. A. George, *J. Am. Chem. Soc.* **1980**, *102*, 6153-6154.
- [52] T. A. George, R. C. Tisdale, *J. Am. Chem. Soc.* **1985**, *107*, 5157-5159.
- [53] J. E. Salt, G. Wilkinson, M. Motevalli, M. B. Hursthouse, *J. Chem. Soc., Dalton Trans.* **1986**, 1141-1154.
- [54] M. T. Mock, S. Chen, M. O'Hagan, R. Rousseau, W. G. Dougherty, W. S. Kassel, R. M. Bullock, *J. Am. Chem. Soc.* **2013**, *135*, 11493-11496.
- [55] A. J. Kendall, S. I. Johnson, R. M. Bullock, M. T. Mock, *J. Am. Chem. Soc.* **2018**, *140*, 2528-2536.
- [56] D. A. Hall, G. J. Leigh, *J. Chem. Soc., Dalton Trans.* **1996**, 3539-3541.
- [57] P. J. Hill, L. R. Doyle, A. D. Crawford, W. K. Myers, A. E. Ashley, *J. Am. Chem. Soc.* **2016**, *138*, 13521-13524.
- [58] L. R. Doyle, P. J. Hill, G. G. Wildgoose, A. E. Ashley, *Dalton Trans.* **2016**, *45*, 7550-7554.



- [59] J. M. Manriquez, R. D. Sanner, R. E. Marsh, J. E. Bercaw, *J. Am. Chem. Soc.* **1976**, *98*, 3042-3044.
- [60] J. R. Dilworth, R. A. Henderson, A. Hills, D. L. Hughes, C. Macdonald, A. N. Stephens, D. R. M. Walton, *J. Chem. Soc., Dalton Trans.* **1990**, 1077-1085.
- [61] R. A. Henderson, S. H. Morgan, A. N. Stephens, *J. Chem. Soc., Dalton Trans.* **1990**, 1101-1106.
- [62] M. Fang, D. S. Lee, J. W. Ziller, R. J. Doedens, J. E. Bates, F. Furche, W. J. Evans, *J. Am. Chem. Soc.* **2011**, *133*, 3784-3787.
- [63] I. Korobkov, S. Gambarotta, G. P. A. Yap, *Angew. Chem. Int. Ed.* **2003**, *42*, 4958-4961.
- [64] P. L. Arnold, T. Ochiai, F. Y. T. Lam, R. P. Kelly, M. L. Seymour, L. Maron, *Nat. Chem.* **2020**, *12*, 654-659.
- [65] M. Falcone, L. Chatelain, R. Scopelliti, I. Živković, M. Mazzanti, *Nature* **2017**, *547*, 332-335.
- [66] H. Nishihara, T. Mori, Y. Tsurita, K. Nakano, T. Saito, Y. Sasaki, *J. Am. Chem. Soc.* **1982**, *104*, 4367-4372.
- [67] G. Jia, R. H. Morris, C. T. Schweitzer, *Inorg. Chem.* **1991**, *30*, 593-594.
- [68] Y. Nishibayashi, S. Iwai, M. Hidai, *Science* **1998**, *279*, 540-542.
- [69] Y. Nishibayashi, S. Iwai, M. Hidai, *J. Am. Chem. Soc.* **1998**, *120*, 10559-10560.
- [70] I. Vidyaratne, J. Scott, S. Gambarotta, P. H. Budzelaar, *Inorg. Chem.* **2007**, *46*, 7040-7049.
- [71] H. Shan, Y. Yang, A. J. James, P. R. Sharp, *Science* **1997**, *275*, 1460.
- [72] J. A. Pool, E. Lobkovsky, P. J. Chirik, *Nature* **2004**, *427*, 527-530.
- [73] B. Wang, G. Luo, M. Nishiura, S. Hu, T. Shima, Y. Luo, Z. Hou, *J. Am. Chem. Soc.* **2017**, *139*, 1818-1821.
- [74] P. Avenier, M. Taoufik, A. Lesage, X. Solans-Monfort, A. Baudouin, A. de Mallmann, L. Veyre, J. M. Basset, O. Eisenstein, L. Emsley, E. A. Quadrelli, *Science* **2007**, *317*, 1056-1060.
- [75] T. Miyazaki, Y. Tanabe, M. Yuki, Y. Miyake, K. Nakajima, Y. Nishibayashi, *Chem. Eur. J.* **2013**, *19*, 11874-11877.
- [76] T. A. Betley, J. C. Peters, *J. Am. Chem. Soc.* **2003**, *125*, 10782-10783.
- [77] S. L. Apps, P. W. Miller, N. J. Long, *Chem. Commun.* **2019**, *55*, 6579-6582.
- [78] M. E. Moret, J. C. Peters, *J. Am. Chem. Soc.* **2011**, *133*, 18118-18121.
- [79] D. L. Suess, J. C. Peters, *J. Am. Chem. Soc.* **2013**, *135*, 4938-4941.
- [80] P. A. Rudd, N. Planas, E. Bill, L. Gagliardi, C. C. Lu, *Eur. J. Inorg. Chem.* **2013**, *2013*, 3898-3906.
- [81] M. D. Fryzuk, B. A. MacKay, B. O. Patrick, *J. Am. Chem. Soc.* **2003**, *125*, 3234-3235.
- [82] S. P. Semproni, E. Lobkovsky, P. J. Chirik, *J. Am. Chem. Soc.* **2011**, *133*, 10406-10409.
- [83] J. Chatt, G. A. Heath, G. J. Leigh, *J. Chem. Soc., Chem. Commun.* **1972**, 444-445.
- [84] J. Chatt, A. A. Diamantis, G. A. Heath, N. E. Hooper, G. J. Leigh, *J. Chem. Soc., Dalton Trans.* **1977**, 688-697.
- [85] J. Chatt, R. A. Head, G. J. Leigh, C. J. Pickett, *J. Chem. Soc., Chem. Commun.* **1977**, 299-300.
- [86] J. Chatt, W. Hussain, G. J. Leigh, H. Neukomm, C. J. Pickett, D. A. Rankin, *J. Chem. Soc., Chem. Commun.* **1980**, 1024-1025.
- [87] J. Rittle, J. C. Peters, *J. Am. Chem. Soc.* **2016**, *138*, 4243-4248.
- [88] D. J. Knobloch, H. E. Toomey, P. J. Chirik, *J. Am. Chem. Soc.* **2008**, *130*, 4248-4249.
- [89] W. H. Bernskoetter, E. Lobkovsky, P. J. Chirik, *Angew. Chem. Int. Ed.* **2007**, *46*, 2858-2861.
- [90] Z. J. Lv, Z. Huang, W. X. Zhang, Z. Xi, *J. Am. Chem. Soc.* **2019**, *141*, 8773-8777.
- [91] M. D. Fryzuk, S. A. Johnson, B. O. Patrick, A. Albinati, S. A. Mason, T. F. Koetzle, *J. Am. Chem. Soc.* **2001**, *123*, 3960-3973.
- [92] J. Ballmann, A. Yeo, B. O. Patrick, M. D. Fryzuk, *Angew. Chem. Int. Ed.* **2011**, *50*, 507-510.
- [93] L. Morello, J. B. Love, B. O. Patrick, M. D. Fryzuk, *J. Am. Chem. Soc.* **2004**, *126*, 9480-9481.
- [94] Y. Nakanishi, Y. Ishida, H. Kawaguchi, *Angew. Chem. Int. Ed.* **2017**, *56*, 9193-9197.
- [95] M. Falcone, L. Barluzzi, J. Andrez, F. Fadaei Tirani, I. Zivkovic, A. Fabrizio, C. Corminboeuf, K. Severin, M. Mazzanti, *Nat. Chem.* **2019**, *11*, 154-160.
- [96] L. R. Doyle, A. J. Wooles, L. C. Jenkins, F. Tuna, E. J. L. McInnes, S. T. Liddle, *Angewandte Chemie International Edition* **2018**, *57*, 6314-6318.
- [97] Y. Sekiguchi, K. Arashiba, H. Tanaka, A. Eizawa, K. Nakajima, K. Yoshizawa, Y. Nishibayashi, *Angewandte Chemie International Edition* **2018**, *57*, 9064-9068.
- [98] A. E. Shilov, *Russian Chemical Bulletin* **2003**, *52*, 2555-2562.
- [99] D. V. Yandulov, R. R. Schrock, *Science* **2003**, *301*, 76-78.
- [100] K. Arashiba, Y. Miyake, Y. Nishibayashi, *Nat. Chem.* **2011**, *3*, 120-125.
- [101] H. Tanaka, K. Arashiba, S. Kuriyama, A. Sasada, K. Nakajima, K. Yoshizawa, Y. Nishibayashi, *Nature Communications* **2014**, *5*, 3737-3737.
- [102] S. Kuriyama, K. Arashiba, K. Nakajima, H. Tanaka, N. Kamaru, K. Yoshizawa, Y. Nishibayashi, *J. Am. Chem. Soc.* **2014**, *136*, 9719-9731.
- [103] T. Itabashi, K. Arashiba, H. Tanaka, A. Konomi, A. Eizawa, K. Nakajima, K. Yoshizawa, Y. Nishibayashi, *Organometallics* **2019**, *38*, 2863-2872.
- [104] S. Kuriyama, K. Arashiba, K. Nakajima, H. Tanaka, K. Yoshizawa, Y. Nishibayashi, *Chem. Sci.* **2015**, *6*, 3940-3951.
- [105] K. Arashiba, E. Kinoshita, S. Kuriyama, A. Eizawa, K. Nakajima, H. Tanaka, K. Yoshizawa, Y. Nishibayashi, *J. Am. Chem. Soc.* **2015**, *137*, 5666-5669.
- [106] A. Eizawa, K. Arashiba, H. Tanaka, S. Kuriyama, Y. Matsuo, K. Nakajima, K. Yoshizawa, Y. Nishibayashi, *Nature Communications* **2017**, *8*, 14874.
- [107] Y. Tanabe, Y. Sekiguchi, H. Tanaka, A. Konomi, K. Yoshizawa, S. Kuriyama, Y. Nishibayashi, *Chem. Commun.* **2020**.
- [108] S. Kuriyama, K. Arashiba, K. Nakajima, Y. Matsuo, H. Tanaka, K. Ishii, K. Yoshizawa, Y. Nishibayashi, *Nat. Commun.* **2016**, *7*, 12181-12181.
- [109] J. S. Anderson, J. Rittle, J. C. Peters, *Nature* **2013**, *501*, 84-87.
- [110] M. J. Chalkley, T. J. Del Castillo, B. D. Matson, J. P. Roddy, J. C. Peters, *ACS Cent. Sci.* **2017**, *3*, 217-223.
- [111] S. E. Creutz, J. C. Peters, *J. Am. Chem. Soc.* **2014**, *136*, 1105-1115.
- [112] T. J. Del Castillo, N. B. Thompson, J. C. Peters, *J. Am. Chem. Soc.* **2016**, *138*, 5341-5350.
- [113] J. Fajardo, J. C. Peters, *J. Am. Chem. Soc.* **2017**, *139*, 16105-16108.
- [114] T. M. Buscagan, P. H. Oyala, J. C. Peters, *Angew. Chem. Int. Ed.* **2017**, *56*, 6921-6926.
- [115] A. Cavaille, B. Joyeux, N. Saffon-Merceron, N. Nebra, M. Fustier-Boutignon, N. Mezailles, *Chem. Commun.* **2018**, *54*, 11953-11956.
- [116] G. Ung, J. C. Peters, *Angew. Chem. Int. Ed.* **2015**, *54*, 532-535.
- [117] L. R. Doyle, P. J. Hill, G. G. Wildgoose, A. E. Ashley, *Dalton Transactions* **2016**, *45*, 7550-7554.
- [118] S. Kuriyama, K. Arashiba, H. Tanaka, Y. Matsuo, K. Nakajima, K. Yoshizawa, Y. Nishibayashi, *Angew. Chem. Int. Ed.* **2016**, *55*, 14291-14295.
- [119] L. R. Doyle, A. J. Wooles, L. C. Jenkins, F. Tuna, E. J. L. McInnes, S. T. Liddle, *Angew. Chem. Int. Ed.* **2018**, *57*, 6314-6318.

- [120] R. Imayoshi, K. Nakajima, Y. Nishibayashi, *Chem. Lett.* **2017**, 46, 466-468.
- [121] K. Shiina, *J. Am. Chem. Soc.* **1972**, 94, 9266-9267.
- [122] J. Yin, J. Li, G. X. Wang, Z. B. Yin, W. X. Zhang, Z. Xi, *J. Am. Chem. Soc.* **2019**, 141, 4241-4247.
- [123] K. Komori, H. Oshita, Y. Mizobe, M. Hidai, *J. Am. Chem. Soc.* **1989**, 111, 1939-1940.
- [124] H. Tanaka, A. Sasada, T. Kouno, M. Yuki, Y. Miyake, H. Nakanishi, Y. Nishibayashi, K. Yoshizawa, *J. Am. Chem. Soc.* **2011**, 133, 3498-3506.
- [125] Q. Liao, N. Saffon-Merceron, N. Mézailles, *Angew. Chem. Int. Ed.* **2014**, 53, 14206-14210.
- [126] Q. Liao, N. Saffon-Merceron, N. Mézailles, *ACS Catal.* **2015**, 5, 6902-6906.
- [127] Y. Ohki, Y. Araki, M. Tada, Y. Sakai, *Chem. Eur. J.* **2017**, 23, 13240-13248.
- [128] M. Yuki, H. Tanaka, K. Sasaki, Y. Miyake, K. Yoshizawa, Y. Nishibayashi, *Nat. Commun.* **2012**, 3, 1254-1254.
- [129] R. Imayoshi, K. Nakajima, J. Takaya, N. Iwasawa, Y. Nishibayashi, *Eur. J. Inorg. Chem.* **2017**, 2017, 3769-3778.
- [130] S. Li, Y. Wang, W. Yang, K. Li, H. Sun, X. Li, O. Fuhr, D. Fenske, *Organometallics* **2020**, 39, 757-766.
- [131] A. D. Piascik, R. Li, H. J. Wilkinson, J. C. Green, A. E. Ashley, *J. Am. Chem. Soc.* **2018**, 140, 10691-10694.
- [132] D. E. Prokopchuk, E. S. Wiedner, E. D. Walter, C. V. Popescu, N. A. Piro, W. S. Kassel, R. M. Bullock, M. T. Mock, **2017**, 139, 9291-9301.
- [133] R. B. Ferreira, B. J. Cook, B. J. Knight, V. J. Catalano, R. García-Serres, L. J. Murray, *ACS Catal.* **2018**, 8, 7208-7212.
- [134] R. Araake, K. Sakadani, M. Tada, Y. Sakai, Y. Ohki, *J. Am. Chem. Soc.* **2017**, 139, 5596-5606.
- [135] R. Imayoshi, H. Tanaka, Y. Matsuo, M. Yuki, K. Nakajima, K. Yoshizawa, Y. Nishibayashi, *Chem. Eur. J.* **2015**, 21, 8905-8909.
- [136] Y. Gao, G. Li, L. Deng, *J. Am. Chem. Soc.* **2018**, 140, 2239-2250.
- [137] T. Suzuki, K. Fujimoto, Y. Takemoto, Y. Wasada-Tsutsui, T. Ozawa, T. Inomata, M. D. Fryzuk, H. Masuda, *ACS Catal.* **2018**, 8, 3011-3015.
- [138] C. A. Sanz, C. A. M. Stein, M. D. Fryzuk, *Eur. J. Inorg. Chem.* **2020**, 2020, 1465-1471.
- [139] R. Kawakami, S. Kuriyama, H. Tanaka, K. Arashiba, A. Konomi, K. Nakajima, K. Yoshizawa, Y. Nishibayashi, *Chem. Commun.* **2019**, 55, 14886-14889.
